# Supplementary material for: Colony formation sustains the global competitiveness of N2-fixing Trichodesmium under ocean acidification
Source: Research Square preprint supplement (doi:10.21203/rs.3.rs-7555372/v1), 2025-10-31
Supplement: Supplementary file 1 [file 933b2a64b2fd50846d49056d.pdf]

Supplementary Information for

**Colony formation sustains the global competitiveness of N<sub>2</sub>-fixing *Trichodesmium* under ocean acidification**

Weicheng Luo<sup>1, 2, 3</sup>, Meri Eichner<sup>2</sup>, Ondřej Prášil<sup>2</sup>, Keisuke Inomura<sup>4</sup>, Futing Zhang<sup>2</sup>, Ya-Wei Luo<sup>1, 5\*</sup>

<sup>1</sup>State Key Laboratory of Marine Environmental Science and College of Ocean and Earth Sciences, Xiamen University, Xiamen 361102, China.

<sup>2</sup>Centre Algatech, Institute of Microbiology of the Czech Academy of Sciences, Třeboň 37901, Czech Republic.

<sup>3</sup>Institute for Advanced Study, Shenzhen University, Shenzhen 518060, China. & College of Life Sciences and Oceanography, Shenzhen University, Shenzhen 518060, China.

<sup>4</sup>Graduate School of Oceanography, University of Rhode Island, Narragansett, RI 02882, USA.

<sup>5</sup>China-ASEAN College of Marine Sciences, Xiamen University Malaysia, Sepang, Selangor 43900, Malaysia

\*To whom correspondence should be addressed. Email: ywluo@xmu.edu.cn (Y-W.L.)

21 **Supplementary Table 1.** Daily average rates in modeled *Trichodesmium* trichome and colony. *Related to Fig. 2.*

| Model cases                      | Growth<br>(d <sup>-1</sup> ) | Gross carbon fixation<br>[mol C (mol C) <sup>-1</sup> d <sup>-1</sup> ] | N <sub>2</sub> fixation<br>[mol N (mol C) <sup>-1</sup> d <sup>-1</sup> ] | Gross fixed C:N<br>[mol C (mol N) <sup>-1</sup> ] | Gross fixed carbon used by respiratory protection | Carbon use efficiency <sup>a</sup> |
|----------------------------------|------------------------------|-------------------------------------------------------------------------|---------------------------------------------------------------------------|---------------------------------------------------|---------------------------------------------------|------------------------------------|
| Trichome (Limiting Fe' = 40 pM)  |                              |                                                                         |                                                                           |                                                   |                                                   |                                    |
| Ambient                          | 0.24                         | 3.2                                                                     | 0.044                                                                     | 74                                                | 88%                                               | 8.5%                               |
| OA                               | 0.18                         | 2.9                                                                     | 0.032                                                                     | 89                                                | 89%                                               | 7.0%                               |
| Trichome (Replete Fe' = 1250 pM) |                              |                                                                         |                                                                           |                                                   |                                                   |                                    |
| Ambient                          | 0.42                         | 3.8                                                                     | 0.082                                                                     | 47                                                | 81%                                               | 13.5%                              |
| OA                               | 0.33                         | 3.5                                                                     | 0.061                                                                     | 58                                                | 83%                                               | 10.9%                              |
| Colony (Limiting Fe' = 40 pM)    |                              |                                                                         |                                                                           |                                                   |                                                   |                                    |
| Ambient                          | 0.20                         | 3.1                                                                     | 0.036                                                                     | 85                                                | 89%                                               | 7.4%                               |
| OA                               | 0.17                         | 2.9                                                                     | 0.029                                                                     | 99                                                | 90%                                               | 6.4%                               |
| Colony (Replete Fe' = 1250 pM)   |                              |                                                                         |                                                                           |                                                   |                                                   |                                    |
| Ambient                          | 0.35                         | 3.6                                                                     | 0.068                                                                     | 53                                                | 83%                                               | 11.8%                              |
| OA                               | 0.30                         | 3.5                                                                     | 0.056                                                                     | 63                                                | 85%                                               | 10.0%                              |

<sup>a</sup> Carbon use efficiency: percentage of gross carbon fixation assimilated to biomass. OA: acidified condition.

**Supplementary Table 2.** Comparison of simulated acidification-induced effects on N<sub>2</sub> fixation from between this study and Luo, et al. <sup>1</sup>. *Related to Fig. 5 and DISCUSSION.*

| Acidification-induced effects on N <sub>2</sub> fixation <sup>a</sup> | Luo, et al. <sup>1</sup> | This study |
|-----------------------------------------------------------------------|--------------------------|------------|
| Energy saving from CCM                                                | < 1%                     | < 1%       |
| Downregulation on nitrogenase efficiency                              | about -40%               | about -40% |
| Reduced energy production by PET or elevated energy consumption       | about -10%               | about -10% |
| Intracellular O <sub>2</sub> management                               | Not considered           | about -5%  |

<sup>a</sup> Model results under Fe limitation were analyzed here.

**Supplementary Table 3.** Modeled daily-integrated rates of *Trichodesmium* colony with toxicity effects. *Related to Fig. 6 and DISCUSSION.*

| Model cases <sup>a</sup> | Growth rate<br>(d <sup>-1</sup> ) | Gross carbon fixation rate<br>[mol C (mol C) <sup>-1</sup> d <sup>-1</sup> ] | N <sub>2</sub> fixation rate<br>[mol N (mol C) <sup>-1</sup> d <sup>-1</sup> ] | Gross fixed C:N<br>[mol C (mol N) <sup>-1</sup> ] | Gross fixed carbon used by respiratory protection | Carbon use efficiency |
|--------------------------|-----------------------------------|------------------------------------------------------------------------------|--------------------------------------------------------------------------------|---------------------------------------------------|---------------------------------------------------|-----------------------|
| Colony (Fe' = 40 pM)     |                                   |                                                                              |                                                                                |                                                   |                                                   |                       |
| Ambient                  | 0.09                              | 2.2                                                                          | 0.015                                                                          | 147                                               | 93.8%                                             | 4.3%                  |
| Acidified                | 0.11                              | 2.5                                                                          | 0.018                                                                          | 139                                               | 93.1%                                             | 4.5%                  |
| Colony (Fe' = 1250 pM)   |                                   |                                                                              |                                                                                |                                                   |                                                   |                       |
| Ambient                  | 0.17                              | 2.4                                                                          | 0.030                                                                          | 82                                                | 88.9%                                             | 7.7%                  |
| Acidified                | 0.20                              | 3.0                                                                          | 0.034                                                                          | 87                                                | 88.9%                                             | 7.2%                  |

<sup>a</sup> Microenvironmental NH<sub>4</sub><sup>+</sup> concentration profile was predefined according to the findings of Klawonn, et al. <sup>2</sup>. The pattern of microenvironmental Cu was set the same as that of NH<sub>4</sub><sup>+</sup>, with the highest concentration (1 nmol L<sup>-1</sup>) at the center of the colony. The elevated iron acquisition due to colony formation under the acidified condition was not taken into consideration here.

33 **Supplementary Table 4.** Fixed model parameters. *Related to METHODS.*

| Symbol                                  | Unit                                               | Definition                                                                                     | Value                  | Source or note          |
|-----------------------------------------|----------------------------------------------------|------------------------------------------------------------------------------------------------|------------------------|-------------------------|
| $OA^{PET}$                              | dimensionless                                      | Parameter of OA impact on the ATP production by PET                                            | 0.4                    | This study <sup>a</sup> |
| $OA^{RESP}$                             | dimensionless                                      | Parameter of OA impact on the ATP production by respiration                                    | 0.4                    | This study <sup>a</sup> |
| $\varepsilon_{CO_2}$                    | dimensionless                                      | Relative CO <sub>2</sub> diffusivity of cell membrane                                          | $1.5 \times 10^{-3}$   | This study <sup>a</sup> |
| $f_{RP}^{CF}$                           | dimensionless                                      | Fraction of CO <sub>2</sub> production by RP to support carbon fixation                        | 75%                    | This study <sup>a</sup> |
| $N_{max}$                               | mol N (mol C) <sup>-1</sup>                        | Maximal fixed storage                                                                          | 0.159                  | This study <sup>b</sup> |
| $CS_{max}$                              | mol C (mol C) <sup>-1</sup>                        | Maximal CS storage                                                                             | 1                      | This study <sup>c</sup> |
| $k_{NH_3}$                              | mol N m <sup>-3</sup>                              | Half-saturating coefficient of NH <sub>3</sub> concentration for the toxic effect              | $3 \times 10^{-5}$     | This study <sup>d</sup> |
| $k_{Cu}$                                | mol Cu m <sup>-3</sup>                             | Half-saturating coefficient of Cu concentration for the toxic effect                           | $2.5 \times 10^{-7}$   | This study <sup>d</sup> |
| $OA^{Cu}$                               | dimensionless                                      | Strength of negative effects from acidification on copper availability                         | 1.65                   | This study <sup>d</sup> |
| $v_{CS}^{max}$                          | mol C (mol C) <sup>-1</sup> s <sup>-1</sup>        | Maximal production rate of CS                                                                  | $8.6 \times 10^{-6}$   | 3                       |
| $k_{CS}$                                | mol C (mol C) <sup>-1</sup>                        | Half-saturating coefficient of CS for RP                                                       | 0.4                    | 3                       |
| $k_{CH_2O}^{CS}$                        | mol C (mol C) <sup>-1</sup>                        | Half-saturating coefficient of CH <sub>2</sub> O for CS production                             | 0.4                    | 3                       |
| $v_{PET}^{max}$                         | mol electron (mol C) <sup>-1</sup> s <sup>-1</sup> | Maximal PET rate                                                                               | $6.6 \times 10^{-3}$   | 3                       |
| $k_{Fe}^{PS}$                           | μmol Fe (mol C) <sup>-1</sup>                      | Half-saturating coefficient of Fe in photosystems for PET rate                                 | 10                     | 3                       |
| $k_{FePS}^{PS_{syn}}$                   | μmol Fe (mol C) <sup>-1</sup>                      | Half-saturating coefficient of $Fe_{PS}$ for the synthesis of photosystems                     | 1.0                    | 3                       |
| $k_{FePS}^{PS_{dec}}$                   | μmol Fe (mol C) <sup>-1</sup>                      | Half-saturating coefficient of $Fe_{PS}$ for the decomposition of photosystems                 | 25                     | 3                       |
| $k_{FeBF}^{NF_{syn}}$                   | μmol Fe (mol C) <sup>-1</sup>                      | Half-saturating coefficient of $Fe_{BF}$ for the synthesis of nitrogenase                      | 5.0                    | 3                       |
| $T_{NF_{max}}^{NA}$                     | μmol Fe (mol C) <sup>-1</sup>                      | Maximal inactivation rate of nitrogenase                                                       | $3.3 \times 10^{-3}$   | 3                       |
| $k_{Fe}^{NF}$                           | μmol Fe (mol C) <sup>-1</sup>                      | Half-saturating coefficient of Fe in nitrogenase for N <sub>2</sub> fixation                   | 91                     | 1                       |
| $k_{O_2}^{NF}$                          | mol O <sub>2</sub> m <sup>-3</sup>                 | Half-saturating coefficient of O <sub>2</sub> for N <sub>2</sub> fixation                      | 0.01                   | 4                       |
| $Fe_{TH}^{bsl}$                         | μmol Fe (mol C) <sup>-1</sup>                      | Threshold of Fe under the baseline condition                                                   | 24.4                   | 1                       |
| $f_{ST}$                                | dimensionless                                      | Fraction of luxury Fe uptake                                                                   | 0.90                   | 1                       |
| $OA^{ST}$                               | dimensionless                                      | Coefficient representing the strength of OA impact on $Fe_{TH}$                                | 0.71                   | 1                       |
| $\alpha_1$                              | μmol <sup>-1</sup> m <sup>2</sup> s                | Initial slope of $P$ versus $I$ curve                                                          | 0.01                   | 5                       |
| $\beta$                                 | (mol C) <sup>-1</sup> mol C s                      | Parameter of inhibition effect of respiration on PET                                           | $2 \times 10^4$        | 4                       |
| $\varepsilon$                           | dimensionless                                      | Relative O <sub>2</sub> diffusivity of cell membrane                                           | $10^{-4}$              | 4                       |
| $d_{O_2}$                               | m <sup>2</sup> s <sup>-1</sup>                     | O <sub>2</sub> diffusion coefficient at 34 PSU and 25 °C                                       | $2.26 \times 10^{-9}$  | 6                       |
| $d_{CO_2}$                              | m <sup>2</sup> s <sup>-1</sup>                     | CO <sub>2</sub> diffusion coefficient at 34 PSU and 25 °C                                      | $1.79 \times 10^{-9}$  | 7                       |
| $\gamma_{MT}$                           | dimensionless                                      | Ratio of the energy consumed by maintenance to other process                                   | 10%                    | 1                       |
| <b>Additional parameters for colony</b> |                                                    |                                                                                                |                        |                         |
| $RC$                                    | m                                                  | Radius of the colony                                                                           | $8 \times 10^{-4}$     | 2                       |
| $d_{HCO_3^-}$                           | m <sup>2</sup> s <sup>-1</sup>                     | HCO <sub>3</sub> <sup>-</sup> diffusion coefficient at 34 PSU and 25 °C                        | $1.10 \times 10^{-9}$  | 7                       |
| $d_{CO_3^{2-}}$                         | m <sup>2</sup> s <sup>-1</sup>                     | CO <sub>3</sub> <sup>2-</sup> diffusion coefficient at 34 PSU and 25 °C                        | $9.28 \times 10^{-10}$ | 7                       |
| $d_{H^+}$                               | m <sup>2</sup> s <sup>-1</sup>                     | H <sup>+</sup> diffusion coefficient at 34 PSU and 25 °C                                       | $8.68 \times 10^{-9}$  | 7                       |
| $d_{OH^-}$                              | m <sup>2</sup> s <sup>-1</sup>                     | OH <sup>-</sup> diffusion coefficient at 34 PSU and 25 °C                                      | $4.91 \times 10^{-9}$  | 7                       |
| $k_{+1}$                                | s <sup>-1</sup>                                    | Forward rate coefficient of<br>$CO_2 + H_2O \xrightleftharpoons[k_{-1}]{k_{+1}} HCO_3^- + H^+$ | $3.60 \times 10^{-2}$  | 7                       |
| $k_{-1}$                                | m <sup>3</sup> mol <sup>-1</sup> s <sup>-1</sup>   | Reverse rate coefficient of<br>$CO_2 + H_2O \xrightleftharpoons[k_{-1}]{k_{+1}} HCO_3^- + H^+$ | 32.2                   | 7                       |
| $k_{+4}$                                | m <sup>3</sup> mol <sup>-1</sup> s <sup>-1</sup>   | Forward rate coefficient of<br>$CO_2 + OH^- \xrightleftharpoons[k_{-4}]{k_{+4}} HCO_3^-$       | 8.28                   | 7                       |
| $k_{-4}$                                | s <sup>-1</sup>                                    | Reverse rate coefficient of<br>$CO_2 + OH^- \xrightleftharpoons[k_{-4}]{k_{+4}} HCO_3^-$       | $3.70 \times 10^{-4}$  | 7                       |

|                                                                    |                                             |                                                                                                                   |                       |       |
|--------------------------------------------------------------------|---------------------------------------------|-------------------------------------------------------------------------------------------------------------------|-----------------------|-------|
| $k_{+5}$                                                           | $\text{m}^3 \text{mol}^{-1} \text{s}^{-1}$  | Forward rate coefficient of<br>$\text{CO}_3^{2-} + \text{H}^+ \xrightleftharpoons[k_{-5}]{k_{+5}} \text{HCO}_3^-$ | $9.75 \times 10^6$    | 7     |
| $k_{-5}$                                                           | $\text{s}^{-1}$                             | Reverse rate coefficient of<br>$\text{CO}_3^{2-} + \text{H}^+ \xrightleftharpoons[k_{-5}]{k_{+5}} \text{HCO}_3^-$ | 9.00                  | 7     |
| $k_{+6}$                                                           | $\text{m}^3 \text{mol}^{-1} \text{s}^{-1}$  | Forward rate coefficient of<br>$\text{H}_2\text{O} \xrightleftharpoons[k_{-6}]{k_{+6}} \text{H}^+ + \text{OH}^-$  | 1.33                  | 7     |
| $k_{-6}$                                                           | $\text{m}^3 \text{mol}^{-1} \text{s}^{-1}$  | Reverse rate coefficient of<br>$\text{H}_2\text{O} \xrightleftharpoons[k_{-6}]{k_{+6}} \text{H}^+ + \text{OH}^-$  | $2.67 \times 10^7$    | 7     |
| <b>Boundary conditions</b>                                         |                                             |                                                                                                                   |                       |       |
| $I_{\max}$                                                         | $\mu\text{mol m}^{-2} \text{s}^{-1}$        | Maximal light intensity in fixed-Fe and dynamic-Fe cases under diurnally changing light intensity                 | 160                   |       |
| $O_2^E$                                                            | $\text{mol O}_2 \text{m}^{-3}$              | Extracellular far-field $\text{O}_2$                                                                              | 0.213                 |       |
| $\text{CO}_2^E$                                                    | $\text{mol C m}^{-3}$                       | Extracellular far-field $\text{CO}_2$                                                                             | 0.014                 |       |
| $\text{HCO}_3^E$                                                   | $\text{mol C m}^{-3}$                       | Extracellular far-field $\text{HCO}_3^-$                                                                          | 1.87                  |       |
| $\text{pH}_{\text{bsl}}$                                           | dimensionless                               | pH value under baseline condition                                                                                 | 8.08                  |       |
| <b>Elemental or energy stoichiometries of metabolic activities</b> |                                             |                                                                                                                   |                       |       |
| $q_{\text{LPET}}^{\text{NADPH}}$                                   | $\text{mol NADPH (mol electron)}^{-1}$      | NADPH/electron ratio of LPET                                                                                      | 0.5                   | 8     |
| $q_{\text{LPET}}^{\text{ATP}}$                                     | $\text{mol ATP (mol electron)}^{-1}$        | ATP/electron ratio of LPET                                                                                        | 0.65                  | 9     |
| $q_{\text{LPET}}^{\text{O}_2}$                                     | $\text{mol O}_2 \text{(mol electron)}^{-1}$ | $\text{O}_2$ /electron ratio of LPET                                                                              | 0.25                  | 8     |
| $q_{\text{AET}}^{\text{ATP}}$                                      | $\text{mol ATP (mol electron)}^{-1}$        | ATP/electron ratio of MR-AET                                                                                      | 0.65                  | 9     |
| $q_{\text{NF}}^{\text{NADPH}}$                                     | $\text{mol NADPH (mol N)}^{-1}$             | NADPH/N ratio of $\text{N}_2$ fixation                                                                            | 3                     | 10,11 |
| $q_{\text{NF}}^{\text{ATP}}$                                       | $\text{mol ATP (mol N)}^{-1}$               | ATP/N ratio of $\text{N}_2$ fixation                                                                              | 9                     | 10,11 |
| $q_{\text{CF}}^{\text{NADPH}}$                                     | $\text{mol NADPH (mol C)}^{-1}$             | NADPH/C ratio of C fixation                                                                                       | 2                     | 12    |
| $q_{\text{CF}}^{\text{ATP}}$                                       | $\text{mol ATP (mol C)}^{-1}$               | ATP/C ratio of C fixation                                                                                         | 3                     | 12    |
| $q_{\text{HCO}_3^-}^{\text{ATP}}$                                  | $\text{mol ATP (mol C)}^{-1}$               | ATP/C ratio of CCM for per $\text{HCO}_3^-$ transportation                                                        | 0.5                   | 13    |
| $q_{\text{BIO}}^{\text{ATP}}$                                      | $\text{mol ATP (mol C)}^{-1}$               | ATP/C ratio of biosynthesis                                                                                       | 2                     | 5     |
| $q_{\text{RESP}}^{\text{ATP}}$                                     | $\text{mol ATP (mol C)}^{-1}$               | ATP/C ratio of respiration                                                                                        | 5                     | 14    |
| $q_{\text{C}}^{\text{O}_2}$                                        | $\text{mol O}_2 \text{(mol C)}^{-1}$        | $\text{O}_2$ /C ratio of respiration                                                                              | 1                     | 14    |
| $Q_{\text{C}}$                                                     | $\text{mol C m}^{-3}$                       | Cellular carbon biomass concentration                                                                             | 18333                 | 15    |
| <b>Morphological parameters of <i>Trichodesmium</i></b>            |                                             |                                                                                                                   |                       |       |
| $L$                                                                | m                                           | Length of the total trichome                                                                                      | $554 \times 10^{-6}$  | 16    |
| $R$                                                                | m                                           | Radius of the cytoplasm                                                                                           | $4.80 \times 10^{-6}$ | 16    |
| $L_g$                                                              | m                                           | Thickness of cell membrane layer                                                                                  | 0.076                 | 16    |

<sup>a</sup> Estimated based on model experiments under constant light intensity.

<sup>b</sup> By multiplying the initial C biomass with the molar N:C (0.159) of *Trichodesmium* <sup>17</sup>.

<sup>c</sup>  $\text{CS}_{\max}$  is set to be the same as the initial C biomass.

<sup>d</sup> Estimated based on model experiments with toxicity effects.

39 **Supplementary Table 5.** Optimized parameters under dynamic light intensity. *Related to METHODS.*

| Symbol              | Unit                                             | Definition                                          | Conditions<br>of Fe level | Value                |                      |                      |                      |
|---------------------|--------------------------------------------------|-----------------------------------------------------|---------------------------|----------------------|----------------------|----------------------|----------------------|
|                     |                                                  |                                                     |                           | Trichome             |                      | Colony               |                      |
|                     |                                                  |                                                     |                           | Ambient              | Acidified            | Ambient              | Acidified            |
| $v_{RP}^{max}$      | mol C (mol C) <sup>-1</sup><br>s <sup>-1</sup>   | Maximal<br>respiratory<br>protection rate           | High Fe                   | 1.3×10 <sup>-3</sup> | 1.3×10 <sup>-3</sup> | 1.2×10 <sup>-3</sup> | 1.4×10 <sup>-3</sup> |
|                     |                                                  |                                                     | Low Fe                    | 1.4×10 <sup>-3</sup> | 1.2×10 <sup>-3</sup> | 1.3×10 <sup>-3</sup> | 1.4×10 <sup>-3</sup> |
| $T_{PS_{max}}^{BF}$ | μmol Fe (mol<br>C) <sup>-1</sup> s <sup>-1</sup> | Maximal<br>synthesis rate of<br>photosystems        | High Fe                   | 2.3×10 <sup>-6</sup> | 1.3×10 <sup>-7</sup> | 2.3×10 <sup>-6</sup> | 1.3×10 <sup>-7</sup> |
|                     |                                                  |                                                     | Low Fe                    | 1.3×10 <sup>-9</sup> | 6.2×10 <sup>-9</sup> | 1.3×10 <sup>-9</sup> | 6.2×10 <sup>-9</sup> |
| $T_{BF_{max}}^{PS}$ | μmol Fe (mol<br>C) <sup>-1</sup> s <sup>-1</sup> | Maximal<br>decomposition<br>rate of<br>photosystems | High Fe                   | 3.1×10 <sup>-3</sup> | 3.9×10 <sup>-4</sup> | 3.1×10 <sup>-3</sup> | 3.9×10 <sup>-4</sup> |
|                     |                                                  |                                                     | Low Fe                    | 1.2×10 <sup>-3</sup> | 1.2×10 <sup>-4</sup> | 1.2×10 <sup>-3</sup> | 1.2×10 <sup>-4</sup> |
| $T_{NF_{max}}^{BF}$ | μmol Fe (mol<br>C) <sup>-1</sup> s <sup>-1</sup> | Maximal<br>synthesis rate of<br>photosystems        | High Fe                   | 2.8×10 <sup>-2</sup> | 2.7×10 <sup>-2</sup> | 2.8×10 <sup>-2</sup> | 2.7×10 <sup>-2</sup> |
|                     |                                                  |                                                     | Low Fe                    | 2.8×10 <sup>-2</sup> | 2.6×10 <sup>-2</sup> | 2.8×10 <sup>-2</sup> | 2.1×10 <sup>-2</sup> |

40

41 **Supplementary Table 6.** Intermediate process variables. *Related to METHODS.*

| Symbol                                                     | Unit                                               | Definition                                                                                               |
|------------------------------------------------------------|----------------------------------------------------|----------------------------------------------------------------------------------------------------------|
| $I$                                                        | $\mu\text{mol m}^{-2} \text{s}^{-1}$               | Daytime light intensity                                                                                  |
| $V_{PET}$                                                  | $\text{mol electron (mol C)}^{-1} \text{s}^{-1}$   | PET rate                                                                                                 |
| $V_{LPET}$                                                 | $\text{mol electron (mol C)}^{-1} \text{s}^{-1}$   | LPET rate                                                                                                |
| $V_{AET}$                                                  | $\text{mol electron (mol C)}^{-1} \text{s}^{-1}$   | AET rate                                                                                                 |
| $f_{AET}$                                                  | dimensionless                                      | Fraction of electrons in PET to AET                                                                      |
| $V_{NAPDH}$                                                | $\text{mol NADPH (mol C)}^{-1} \text{s}^{-1}$      | NADPH production rate                                                                                    |
| $V_{ATP}$                                                  | $\text{mol ATP (mol C)}^{-1} \text{s}^{-1}$        | ATP production rate                                                                                      |
| $V_{O_2}$                                                  | $\text{mol O}_2 \text{(mol C)}^{-1} \text{s}^{-1}$ | O <sub>2</sub> production rate                                                                           |
| $V_{NF}^{max}$                                             | $\text{mol N (mol C)}^{-1} \text{s}^{-1}$          | Maximal N <sub>2</sub> fixation rate                                                                     |
| $V_{NF}$                                                   | $\text{mol N (mol C)}^{-1} \text{s}^{-1}$          | N <sub>2</sub> fixation rate                                                                             |
| $\Phi$                                                     | dimensionless                                      | Intracellular requirement of N <sub>2</sub> fixation                                                     |
| $V_{NF}^{CCM}$                                             | $\text{mol N (mol C)}^{-1} \text{s}^{-1}$          | N <sub>2</sub> fixation rate supported by energy saving from CCM                                         |
| $V_{NAPDH}^{NF}$                                           | $\text{mol NADPH (mol C)}^{-1} \text{s}^{-1}$      | NADPH consumption rate of N <sub>2</sub> fixation                                                        |
| $V_{ATP}^{NF}$                                             | $\text{mol ATP (mol C)}^{-1} \text{s}^{-1}$        | ATP consumption rate of N <sub>2</sub> fixation                                                          |
| $q_{CCM}^{ATP}$                                            | $\text{mol ATP (mol C)}^{-1}$                      | Energy cost for per DIC transportation of CCM                                                            |
| $V_{ATP}^{CCM}$                                            | $\text{mol ATP (mol C)}^{-1} \text{s}^{-1}$        | ATP consumption rate of CCM                                                                              |
| $V_{ATP}^{CCM, saving}$                                    | $\text{mol ATP (mol C)}^{-1} \text{s}^{-1}$        | Rate of energy saving by CCM                                                                             |
| $V_{NAPDH}^{CF}$                                           | $\text{mol NADPH (mol C)}^{-1} \text{s}^{-1}$      | NADPH consumption rate of C fixation                                                                     |
| $V_{ATP}^{CF}$                                             | $\text{mol ATP (mol C)}^{-1} \text{s}^{-1}$        | ATP consumption rate of C fixation                                                                       |
| $V_{CS}$                                                   | $\text{mol C (mol C)}^{-1} \text{s}^{-1}$          | Carbon skeleton production rate                                                                          |
| $V_{RP}$                                                   | $\text{mol C (mol C)}^{-1} \text{s}^{-1}$          | Respiratory protection rate                                                                              |
| $V_{O_2}^{RP}$                                             | $\text{mol O}_2 \text{(mol C)}^{-1} \text{s}^{-1}$ | O <sub>2</sub> consumption rates by respiratory protection                                               |
| $T_{O_2}$                                                  | $\text{mol O}_2 \text{m}^{-3} \text{s}^{-1}$       | O <sub>2</sub> diffusion rate between cytoplasm and far-field environment                                |
| $T_{CO_2}$                                                 | $\text{mol CO}_2 \text{m}^{-3} \text{s}^{-1}$      | CO <sub>2</sub> diffusion rate between cytoplasm and far-field environment                               |
| $Fe_{TH}$                                                  | $\mu\text{mol Fe (mol C)}^{-1}$                    | Threshold of intracellular metabolic Fe quota                                                            |
| $Fe_M$                                                     | $\mu\text{mol Fe (mol C)}^{-1}$                    | Intracellular Fe quota in metabolism                                                                     |
| $Fe_{ST}$                                                  | $\mu\text{mol Fe (mol C)}^{-1}$                    | Intracellular Fe quota in storage                                                                        |
| $T_{PS}^{BF}$                                              | $\mu\text{mol Fe (mol C)}^{-1} \text{s}^{-1}$      | Synthesis rate of photosystems                                                                           |
| $T_{BF}^{PS}$                                              | $\mu\text{mol Fe (mol C)}^{-1} \text{s}^{-1}$      | Decomposition rate of photosystems                                                                       |
| $T_{NF}^{BF}$                                              | $\mu\text{mol Fe (mol C)}^{-1} \text{s}^{-1}$      | Synthesis rate of nitrogenase                                                                            |
| $T_{NF}^{NA}$                                              | $\mu\text{mol Fe (mol C)}^{-1} \text{s}^{-1}$      | Inactivation rate of nitrogenase                                                                         |
| $Bio$                                                      | $\text{mol C (mol C)}^{-1}$                        | New synthesized biomass                                                                                  |
| $Bio_N$                                                    | $\text{mol C (mol C)}^{-1}$                        | New synthesized N-based biomass                                                                          |
| $Bio_C$                                                    | $\text{mol C (mol C)}^{-1}$                        | New synthesized C-based biomass                                                                          |
| $CH_2O_{BIO}^{RESP}$                                       | $\text{mol C (mol C)}^{-1}$                        | Respired carbohydrates to fulfill the energy need for biosynthesis                                       |
| $G$                                                        | $\text{d}^{-1}$                                    | Specific growth rate                                                                                     |
| <b>Additional intermediate process variables of colony</b> |                                                    |                                                                                                          |
| $\psi$                                                     | dimensionless                                      | Porosity of colony                                                                                       |
| $\eta$                                                     | dimensionless                                      | DIC limitation effect on CF                                                                              |
| $\zeta$                                                    | dimensionless                                      | Toxicity effects of NH <sub>3</sub> and/or Cu                                                            |
| $J_{CO_2^M}$                                               | $\text{mol C m}^{-3} \text{s}^{-1}$                | Change rates of CO <sub>2</sub> driven by the chemical reactions in carbonate systems                    |
| $J_{HCO_3^M}$                                              | $\text{mol C m}^{-3} \text{s}^{-1}$                | Change rates of HCO <sub>3</sub> <sup>-</sup> driven by the chemical reactions in carbonate systems      |
| $J_{CO_3^{2-}M}$                                           | $\text{mol C m}^{-3} \text{s}^{-1}$                | Change rates of CO <sub>3</sub> <sup>2-</sup> driven by the chemical reactions in carbonate systems      |
| $J_{H^+M}$                                                 | $\text{mol H}^+ \text{m}^{-3} \text{s}^{-1}$       | Change rates of H <sup>+</sup> driven by the chemical reactions in carbonate systems                     |
| $J_{OH^+M}$                                                | $\text{mol OH}^- \text{m}^{-3} \text{s}^{-1}$      | Change rates of OH <sup>-</sup> driven by the chemical reactions in carbonate systems                    |
| $T_{C, O_2}^M$                                             | $\text{mol O}_2 \text{m}^{-3} \text{s}^{-1}$       | O <sub>2</sub> diffusion rate between the intracellular cytoplasm and the extracellular microenvironment |
| $T_{C, CO_2}^M$                                            | $\text{mol C m}^{-3} \text{s}^{-1}$                | Net biological consumption rates of CO <sub>2</sub> of colony                                            |
| $T_{C, HCO_3}^M$                                           | $\text{mol C m}^{-3} \text{s}^{-1}$                | Net biological consumption rates of HCO <sub>3</sub> <sup>-</sup> of colony                              |
| $T_{C, H}^M$                                               | $\text{mol H}^+ \text{m}^{-3} \text{s}^{-1}$       | Net biological consumption rates of H <sup>+</sup> of colony                                             |

42



43 **Supplementary Table 7.** State variables. *Related to METHODS.*

| Symbol         | Unit                                | Definition                                        |
|----------------|-------------------------------------|---------------------------------------------------|
| $CH_2O$        | mol C (mol C) <sup>-1</sup>         | Carbohydrate                                      |
| $CS$           | mol C (mol C) <sup>-1</sup>         | Carbon skeleton                                   |
| $N$            | mol N (mol C) <sup>-1</sup>         | Fixed N                                           |
| $O_2$          | mol O <sub>2</sub> m <sup>-3</sup>  | Intracellular O <sub>2</sub>                      |
| $Fe_{PS}$      | μmol Fe (mol C) <sup>-1</sup>       | Fe in photosystems                                |
| $Fe_{NF}$      | μmol Fe (mol C) <sup>-1</sup>       | Fe in active nitrogenase                          |
| $Fe_{NF}^{NA}$ | μmol Fe (mol C) <sup>-1</sup>       | Fe in inactivated nitrogenase                     |
| $Fe_{BF}$      | μmol Fe (mol C) <sup>-1</sup>       | Fe in buffer                                      |
| $O_2^M$        | mol O <sub>2</sub> m <sup>-3</sup>  | O <sub>2</sub> in microenvironment                |
| $CO_2^M$       | mol C m <sup>-3</sup>               | CO <sub>2</sub> in microenvironment               |
| $HCO_3^M$      | mol C m <sup>-3</sup>               | HCO <sub>3</sub> <sup>-</sup> in microenvironment |
| $CO_3^M$       | mol C m <sup>-3</sup>               | CO <sub>3</sub> <sup>2-</sup> in microenvironment |
| $H^M$          | mol H <sup>+</sup> m <sup>-3</sup>  | H <sup>+</sup> in microenvironment                |
| $OH^M$         | mol OH <sup>-</sup> m <sup>-3</sup> | OH <sup>-</sup> in microenvironment               |

44 Note: The initial values (t = 0) of  $CH_2O$ ,  $CS$  and  $N$  are set to be 0, and initial O<sub>2</sub> concentrations is the same as that of ambient O<sub>2</sub> (0.213  
45 mol O<sub>2</sub> m<sup>-3</sup>). Initial iron quotas are set the same as observational data from <sup>18</sup>. Initial components in the carbonate system are set as those  
46 under ambient or acidified conditions.

**Supplementary Table 8.** Comparison of modeled and observed growth rates under diurnally constant light intensity.  
*Related to METHODS.*

| Growth rate<br>(d <sup>-1</sup> ) | Ambient<br>(Fe' = 40 pM) | Acidified<br>(Fe' = 40 pM) | Ambient<br>(Fe' = 1250 pM) | Acidified<br>(Fe' = 1250 pM) |
|-----------------------------------|--------------------------|----------------------------|----------------------------|------------------------------|
| Observation <sup>a</sup>          | 0.26 ± 0.02              | 0.19 ± 0.01                | 0.46 ± 0.01                | 0.37 ± 0.01                  |
| Model                             | 0.25                     | 0.18                       | 0.46                       | 0.36                         |

<sup>a</sup> Data are from Shi, et al. <sup>18</sup>.

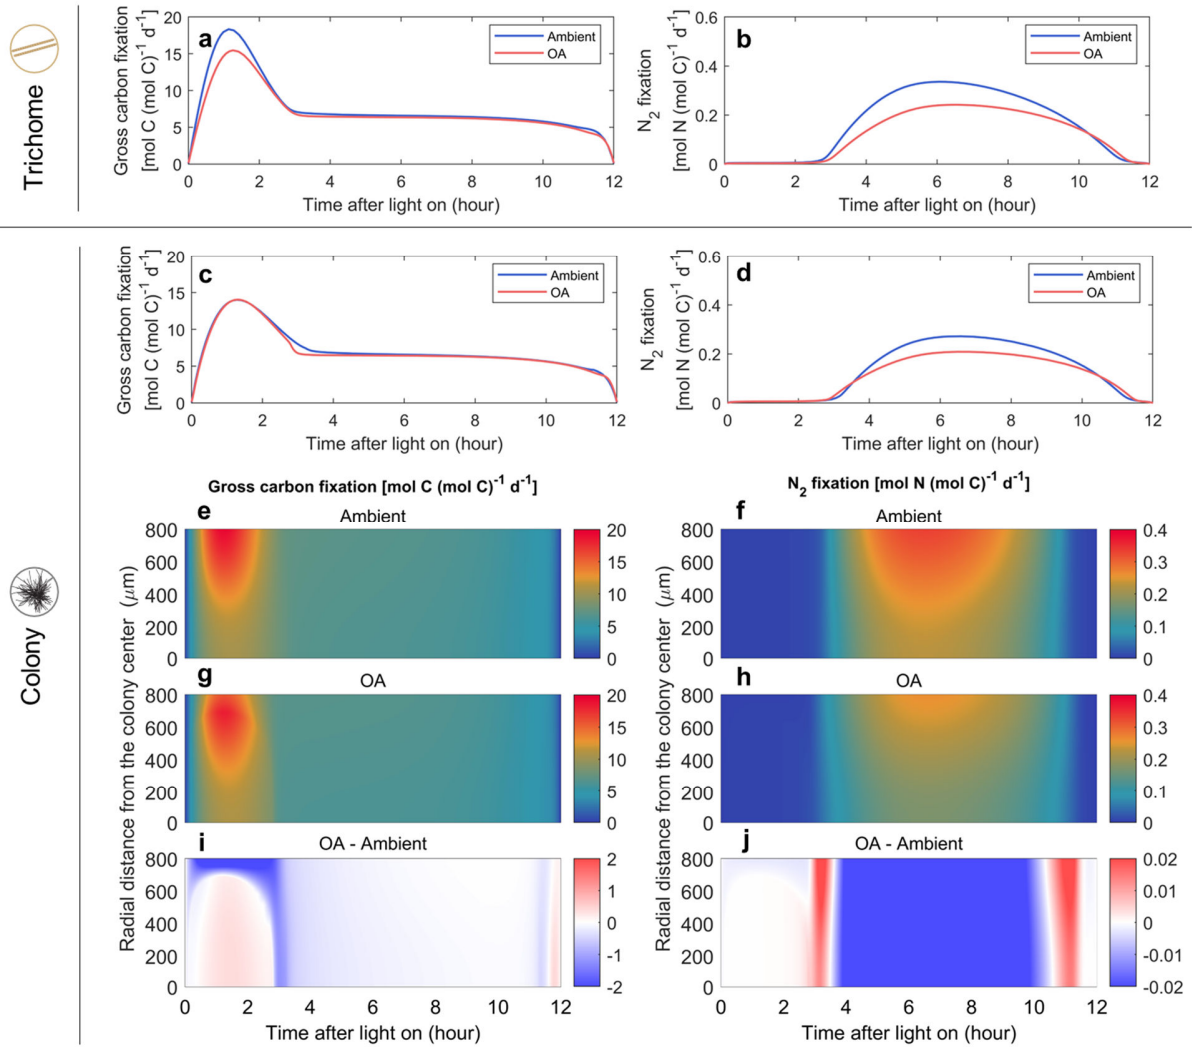

**Supplementary Figure 1.** Simulated results of *Trichodesmium* trichome and colony under replete Fe condition.

Related to Fig. 3. (a, b) The comparison of the trichome model results under ambient and acidified (OA) conditions. The colony model results under ambient and OA conditions are compared in both (c, d) their average temporal and (e–j) spatiotemporal patterns. The spatiotemporal results include those under ambient conditions (e, f), OA conditions (g, h) and OA minus ambient results (i, j). Left panels present gross carbon fixation rates and right panels are N<sub>2</sub> fixation rates. The simulation was under a replete Fe<sup>3+</sup> concentration of 1250 pM. The figure of colony was modified from Klawonn, et al. <sup>2</sup>.

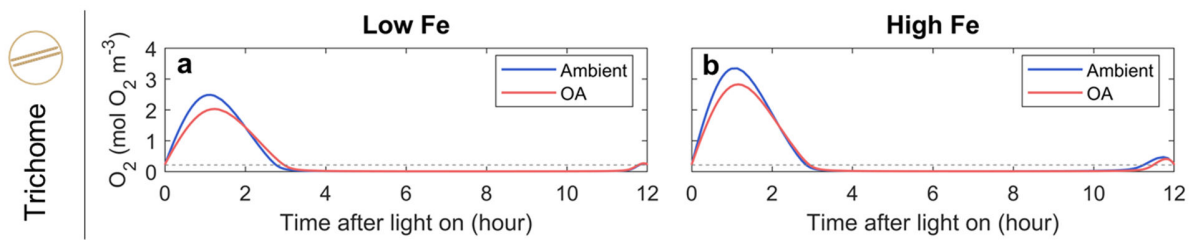

**Supplementary Figure 2.** Instantaneous intracellular oxygen concentrations of modeled *Trichodesmium* trichome during light period.

Related to Fig. 3. The trichome models were simulated under both ambient and acidified (OA) conditions with Fe' at 40 and 1250 pM, respectively.

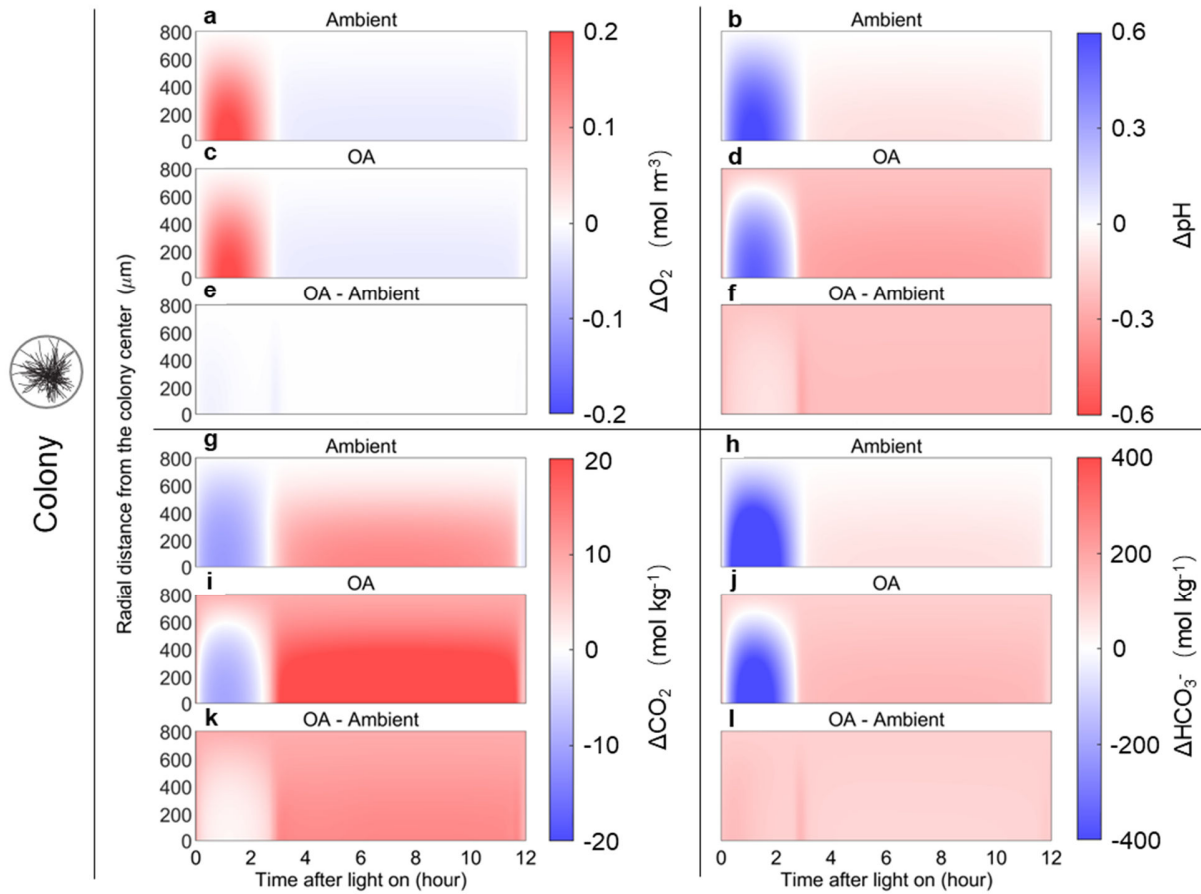

**Supplementary Figure 3.** Model experiments testing the impact of porosity gradients in biological processes on the formation of chemical gradients in the microenvironment of the colony under limiting Fe condition.

*Related to Fig. 4.* The colony models were simulated under both ambient (a, b, g, h) and OA (c, d, i, j) conditions with Fe' at 40 pM. The concentrations of these parameters are shown as anomaly to those under ambient far-field conditions. The changes of these concentrations caused by OA are also displayed (e, f, k, l). The physical diffusion in the microenvironment was simulated using full porosity (constantly 1.0 from the center to the edge). The biological processes were simulated differently using the porosity with a gradient increasing to 1.0 at the outer edge of the colony based on Klawonn, et al. <sup>2</sup>.

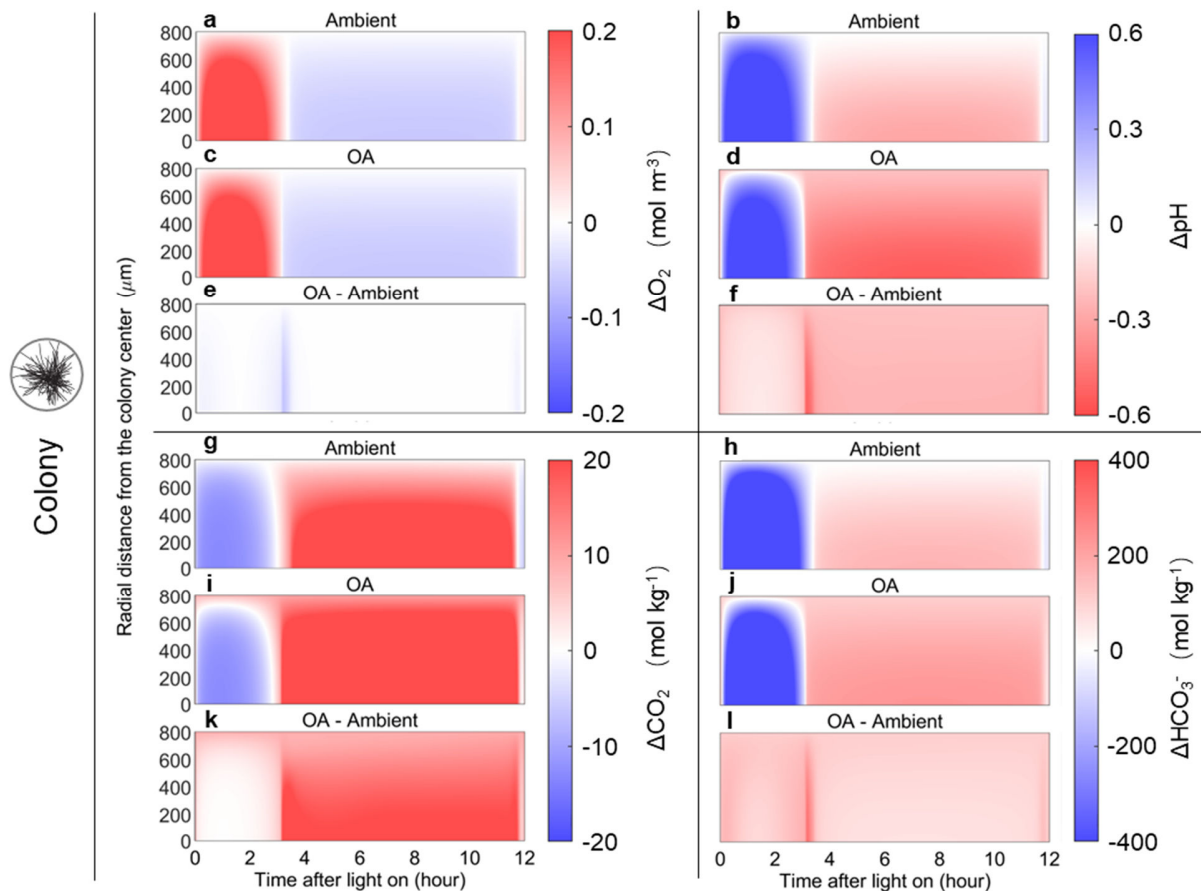

**Supplementary Figure 4.** Model experiments testing the impact of constant porosity on the formation of chemical gradients in the microenvironment of the colony under limiting Fe condition.

Related to Fig. 4. The colony models were simulated under both ambient (a, b, g, h) and OA (c, d, i, j) conditions with Fe' at 40 pM. The concentrations of these parameters are shown as anomaly to those under ambient far-field conditions. The changes of these concentrations caused by OA are also displayed (e, f, k, l). Both physical diffusion and biological processes in the microenvironment were simulated using constant porosity (0.9937) from the center to the edge of the colony based on the average level of Klawonn, et al. <sup>2</sup>. Results show that the chemical gradients were formed even though the porosity was set constant, indicating the formation of chemical gradients was primarily attributed to diffusion limitation rather than high cell density in the center of the colony.

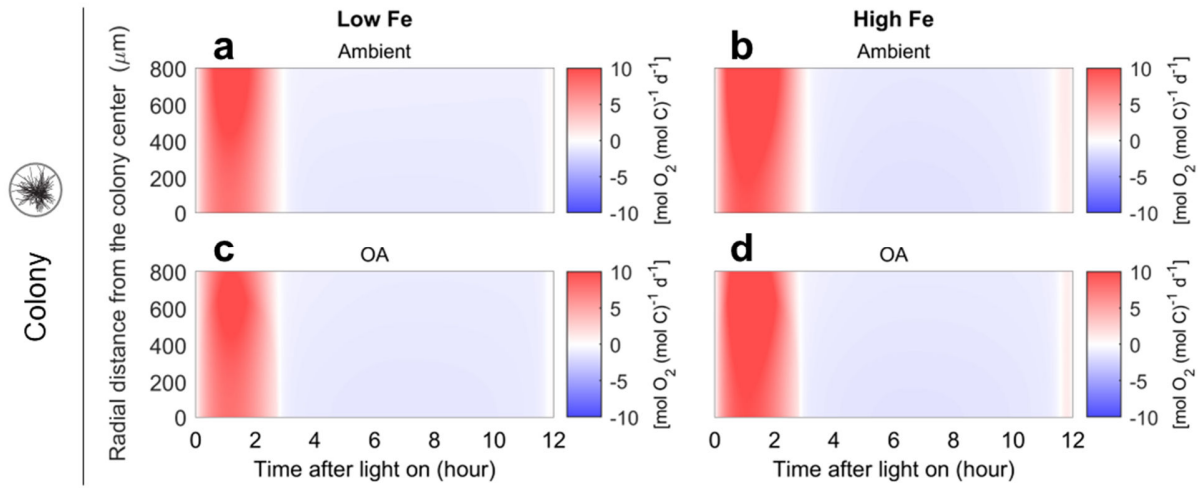

**Supplementary Figure 5.** Net  $\text{O}_2$  production in the colony.

Related to Fig. 4. The colony models were simulated under ambient and acidified (OA) conditions and under low-Fe ( $\text{Fe}' = 40 \text{ pM}$ ) and high-Fe ( $\text{Fe}' = 1250 \text{ pM}$ ) conditions.





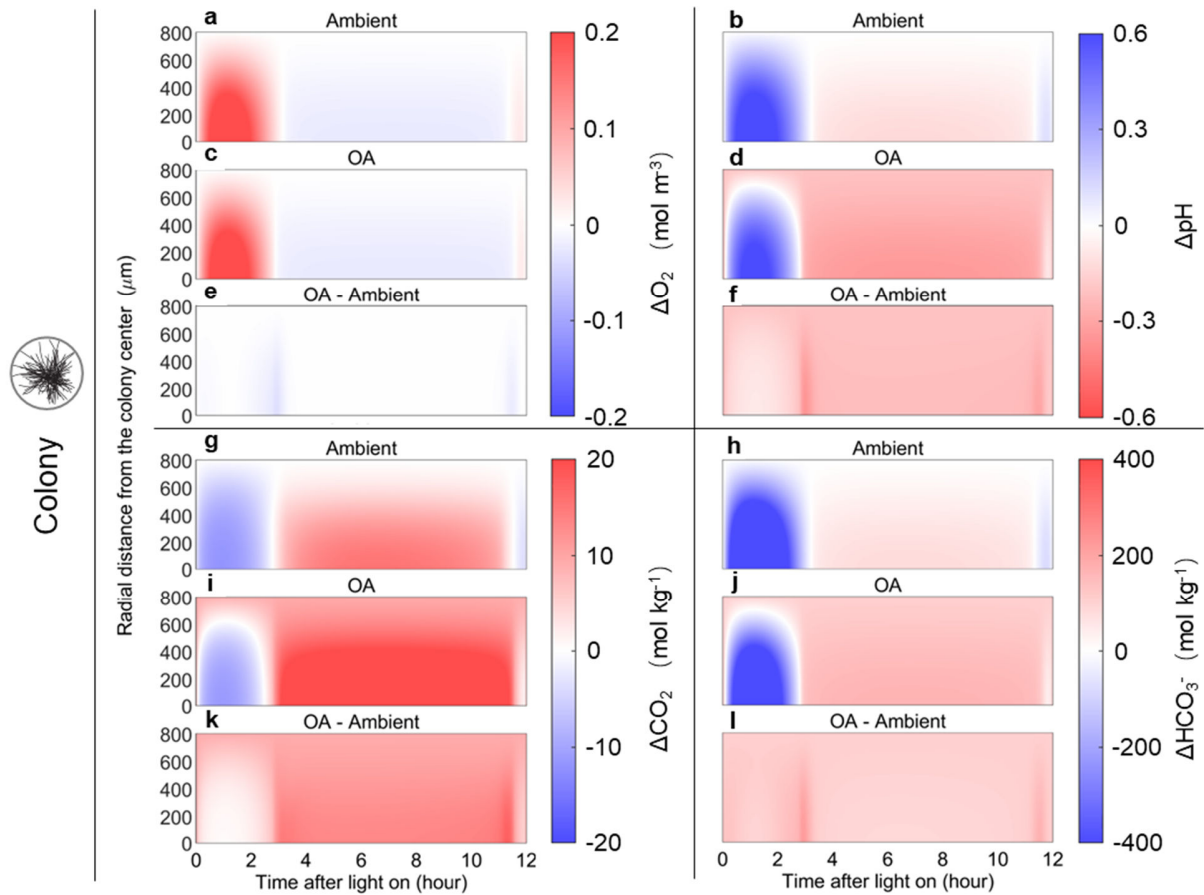

**Supplementary Figure 7.** Simulated  $O_2$ , pH,  $CO_2$  and  $HCO_3^-$  concentrations in the microenvironment of the colony under replete Fe condition. Related to Fig. 4. The colony models were simulated under both ambient (a, b, g, h) and OA (c, d, i, j) conditions with  $Fe'$  at 1250 pM. The concentrations of these parameters are shown as anomaly to those under ambient far-field conditions. The changes of these concentrations caused by OA are also displayed (e, f, k, l).

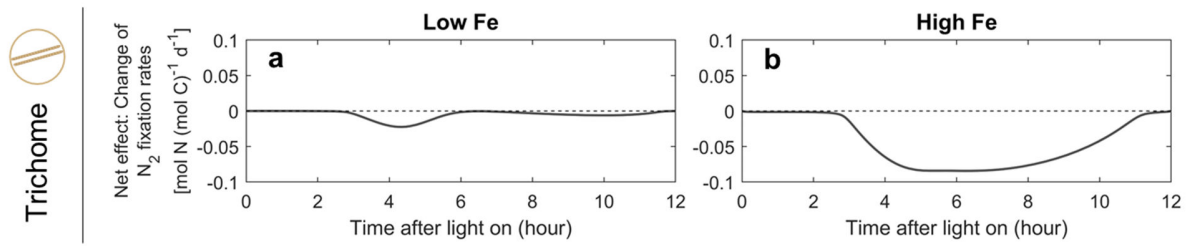

**Supplementary Figure 8.** Changes of  $N_2$  fixation rates in *Trichodesmium* trichome caused by net effects between allocation of Fe to active nitrogenase and pH on nitrogenase efficiency.

Related to Fig. 5. The trichome models were simulated under both ambient and acidified (OA) conditions with  $Fe'$  at 40 and 1250 pM, respectively.

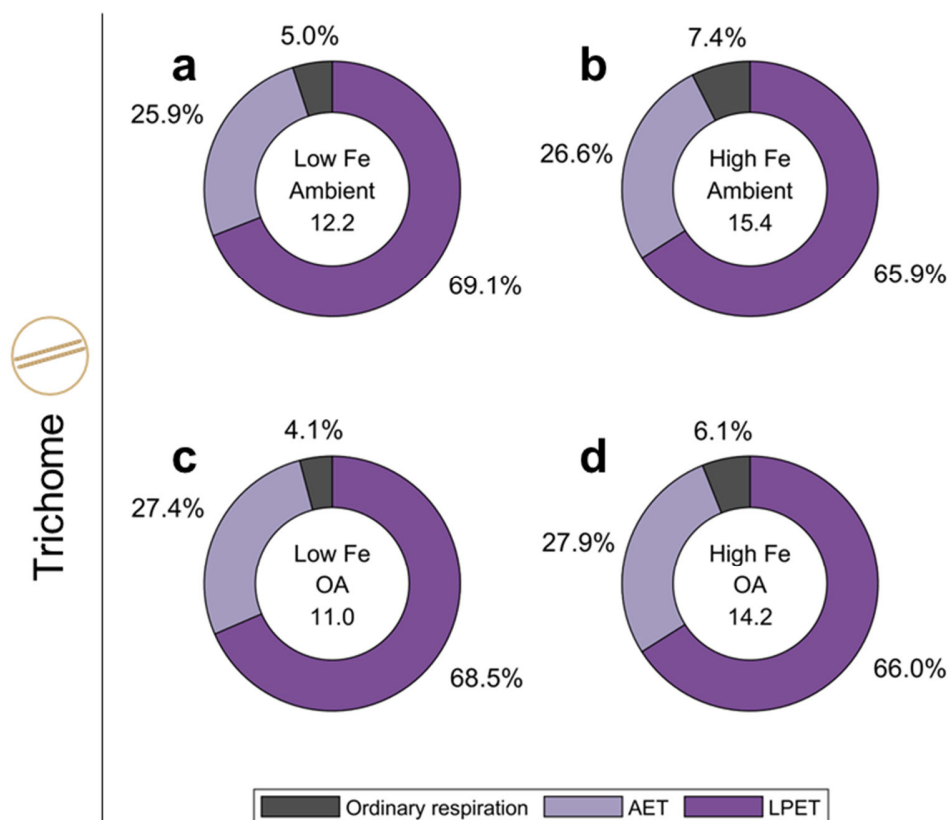

109

110 **Supplementary Figure 9.** Modeled daily-integrated energy (ATP) production of *Trichodesmium* trichome.

111 *Related to DISCUSSION.* The trichome model was simulated under ambient (a, b) or acidified (OA) (c, d) conditions

112 with Fe' at 40 pM (a, c) or 1250 pM (b, d). The number in the inner circle represents the daily-integrated gross energy

113 production rate [mol ATP (mol C)<sup>-1</sup> d<sup>-1</sup>].

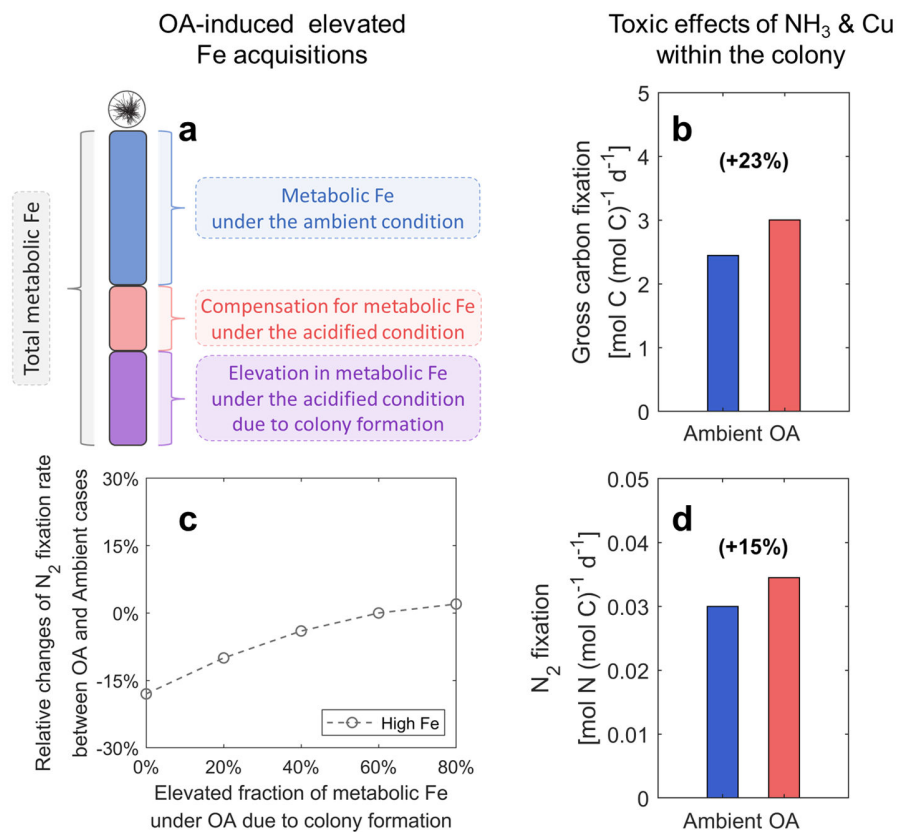

**Supplementary Figure 10.** Results of model experiments of other potential mechanisms of the OA effects on *Trichodesmium* colonies under Fe repletion.

Related to Fig. 6. (a, c) OA-induced elevated Fe acquisition when *Trichodesmium* forms colonies: (a) Schematic diagrams are for the metabolic Fe in modeled *Trichodesmium* colony. (c) Also shown are the relative changes of N<sub>2</sub> fixation rates in the modeled colony from acidified to ambient conditions.

(b, d) Toxic effects of ammonia and copper. The microenvironmental NH<sub>4</sub><sup>+</sup> concentration gradients decreases from 1.0 μmol L<sup>-1</sup> in the center to 0.4 μmol L<sup>-1</sup> at the edge. The colony models were simulated under ambient or acidified (OA) conditions at a replete Fe' level (1250 pM).

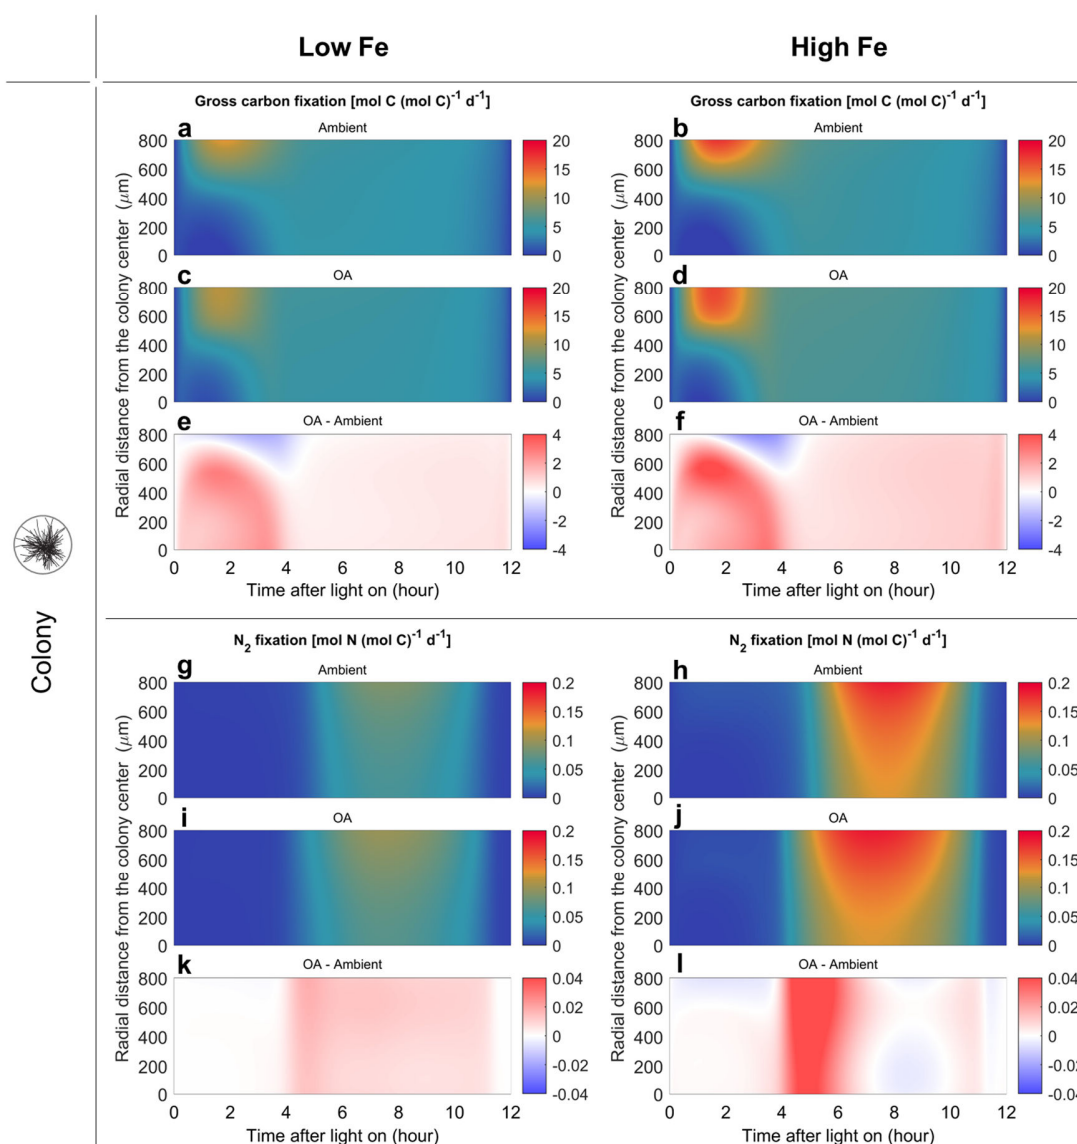

**Supplementary Figure 11.** Model results of *Trichodesmium* colony with toxicity effects of ammonia and copper. Related to Fig. 6 and DISCUSSION. The colony models were simulated under ambient or acidified (OA) conditions. Top panels present gross carbon fixation rate and bottom panels are  $N_2$  fixation rates. The simulations were under limiting  $\text{Fe}'$  concentration of 40 pM (left column) or replete  $\text{Fe}'$  of 1250 pM (right column). In the colony model, microenvironmental  $\text{NH}_4^+$  concentration profile was predefined according to the findings of Klawonn, et al. <sup>2</sup>. The pattern of microenvironmental Cu was set the same as that of  $\text{NH}_4^+$ , with the highest concentration ( $1 \text{ nmol L}^{-1}$ ) at the center of the colony. Red area (e, f, k, l) represents higher carbon or  $N_2$  fixation rates under OA.

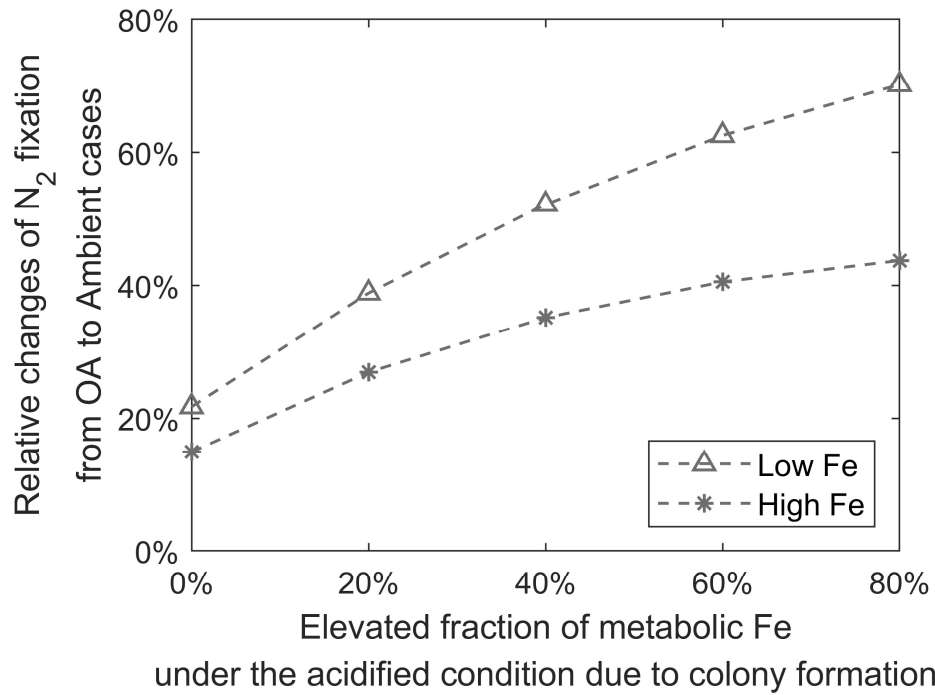

**Supplementary Figure 12.** Results of model experiments testing effects of elevated Fe acquisition in *Trichodesmium* colonies when considering ammonia and copper toxicity.

*Related to Fig. 6 and DISCUSSION.* The colony models were simulated under ambient or acidified (OA) conditions at limiting (40 pM) and replete (1250 pM) Fe' level.

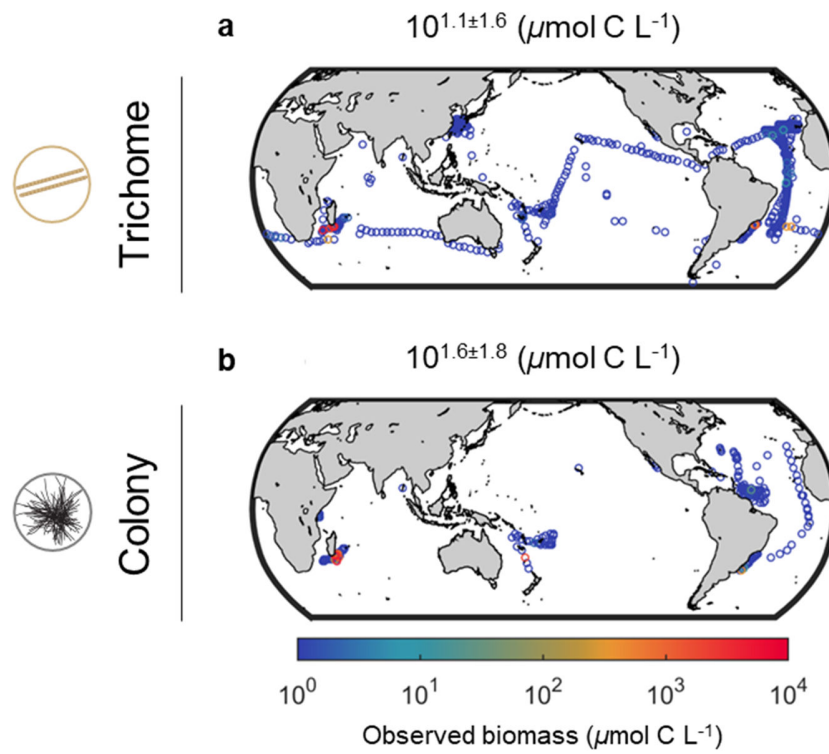

**Supplementary Figure 13.** The observed biomass of trichome and colony.

*Related to Fig. 7 and DISCUSSION.*

(a, b) Observations<sup>19</sup> with geometric mean and standard deviation. Values (b) represent colony biomass calculated from raw database data<sup>19</sup> with a 0.25 multiplier applied to adjust for seasonal occurrence of colonies<sup>20</sup>.

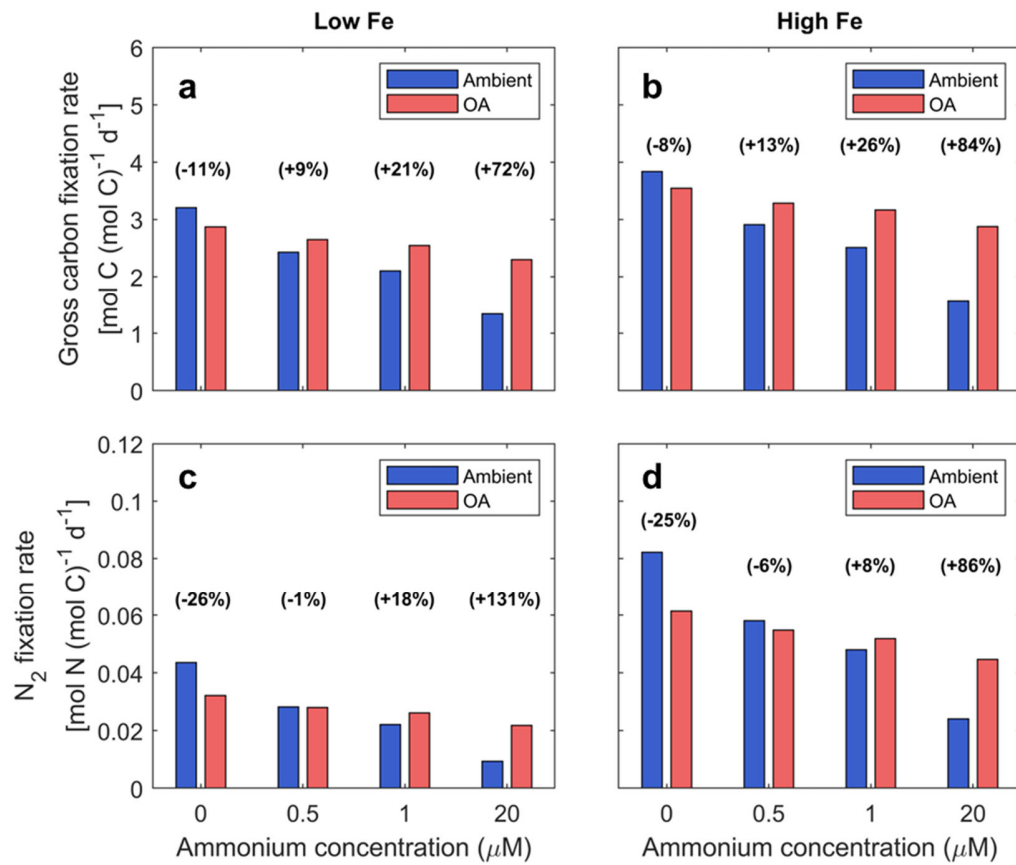

**Supplementary Figure 14.** Results of model experiments of toxic effects of ammonia and copper in free trichomes. Related to *DISCUSSION* and *METHODS*. The trichome models were simulated under ambient or acidified (OA) conditions and under limiting-Fe (Fe' = 40 pM) and replete-Fe (Fe' = 1250 pM) conditions. The concentration of total dissolved copper was set 1 nmol L<sup>-1</sup>, which is at the same level as that of the YBC-II medium<sup>21</sup>. Model results were constrained using observations with artificially introduced toxicity<sup>22,23</sup>.



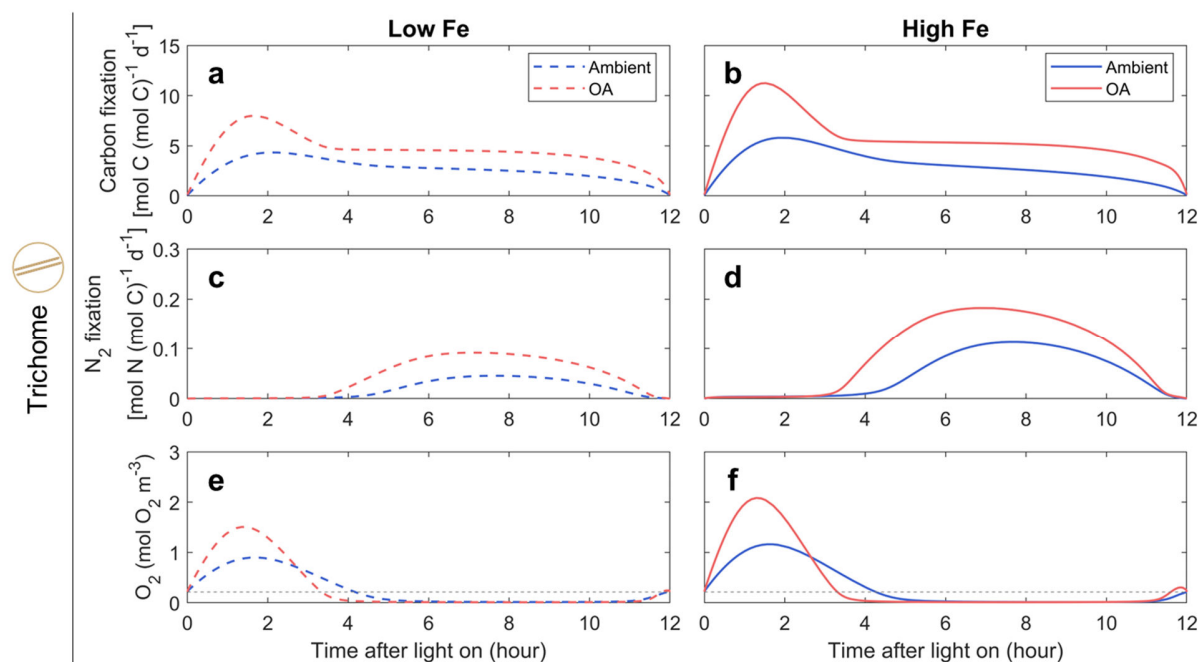

**Supplementary Figure 15.** Results of model experiments on OA effects when considering ammonia and copper toxicity in free trichomes.

*Related to DISCUSSION and METHODS.* The trichome models were simulated under ambient (blue lines) or acidified (OA) (red lines) conditions with  $\text{Fe}'$  at 40 pM (a, c, e) or 1250 pM (b, d, f). The shown results include instantaneous rates of gross carbon fixation (a, b) and  $\text{N}_2$  fixation (c, d), as well as intracellular  $\text{O}_2$  concentrations (e, f). For the experiments, the concentration of total dissolved copper was set  $1 \text{ nmol L}^{-1}$ , which is at the same level as that of YBC-II medium<sup>21</sup>; the ammonium concentration was set at  $20 \text{ } \mu\text{mol L}^{-1}$  as Hong, et al.<sup>22</sup>. The black dashed lines in (e) and (f) represent the far-field extracellular  $\text{O}_2$  concentration. In the presence of Cu and  $\text{NH}_3$  toxicity, OA not only enhanced  $\text{N}_2$  fixation potential of *Trichodesmium* free trichomes but also increased their carbon fixation rates. This led to greater carbohydrate accumulation during the early light period, which facilitated the formation of the low- $\text{O}_2$  window, further promoting  $\text{N}_2$  fixation rates.

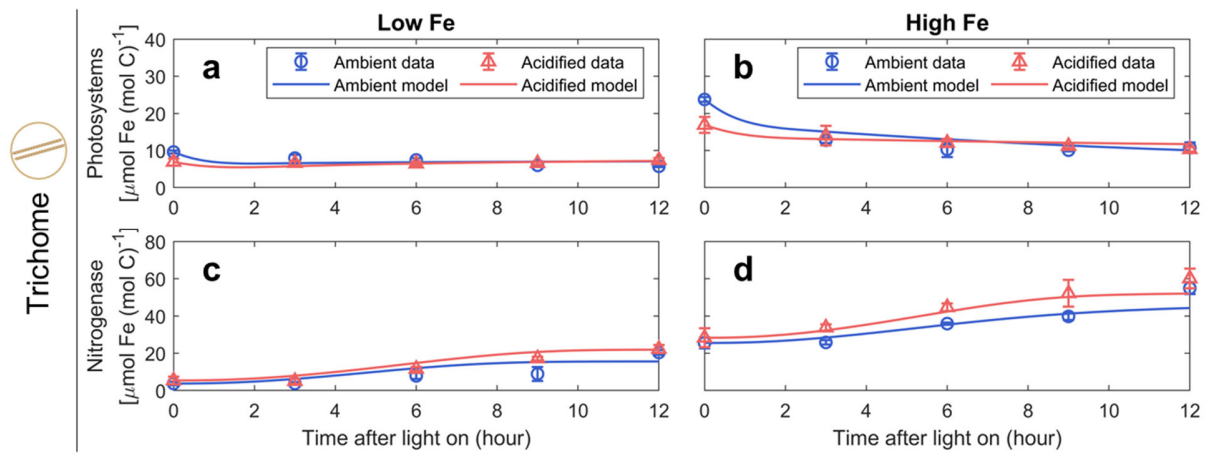

**Supplementary Figure 16.** Modeled and observed diurnal variations of Fe in photosystems and nitrogenase in *Trichodesmium* free trichome.

*Related to METHODS.* The observational data are from Shi, et al. <sup>18</sup>. The model was simulated under both ambient (blue lines) and acidified (red lines) conditions with a constant light intensity and Fe' concentrations of 40 pM (a, c) and 1250 pM (b, d).

**Supplementary Methods.** Full model description. *Related to METHODS.*

We introduce the schemes of single trichome first, and then describe the model parametrizations of *Trichodesmium* colony.

### 1. Light intensity and photosynthetic pathways

The daytime light intensity ( $I$ ,  $\mu\text{mol m}^{-2} \text{s}^{-1}$ ) is <sup>24</sup>:

$$I(t) = I_{\max} \cdot \sin\left(\frac{\pi t}{43,200}\right), \quad (\text{S1})$$

where  $I_{\max}$  is the maximal light intensity and  $t$  is the time (s) during a 12-hour light period.

Linear photosynthetic electron transfer (LPET) and alternative electron transfer (AET) are simulated in our model (Fig. 1a). Because (Mehler reaction)-mediated AET is probably the dominant AET in *Trichodesmium* <sup>25</sup>, other AET (e.g., the cyclic electron transfer around photosystem I, the AET mediated by midstream oxidase with photosystem II, and the AET from photosystem II to the respiratory terminal oxidase respiratory terminal oxidase) <sup>26</sup>, are not considered.

Both LPET and AET generate a proton gradient of 12  $\text{H}^+$  per 8 photons <sup>9</sup>. By assuming that 3 ATP are produced by the thylakoid ATP synthase with a proton gradient of 14  $\text{H}^+$ , for 4 electrons through PET, LPET produces 2.6 ATP, with 2 NADPH and 1  $\text{O}_2$ , while AET only produces 2.6 ATP <sup>8,9,26</sup>.

The total PET rate [ $V_{\text{PET}}$ , mol electron (mol C)<sup>-1</sup> s<sup>-1</sup>] is modulated by light intensity ( $I$ ) and increases with the amount of Fe allocated to photosystems [ $Fe_{\text{PS}}$ ,  $\mu\text{mol Fe (mol C)}^{-1}$ ], and  $V_{\text{PET}}$  is inhibited by respiratory protection (RP) [ $V_{\text{RP}}$ , mol C (mol C)<sup>-1</sup> s<sup>-1</sup>, described later] <sup>27</sup>.

$$V_{\text{PET}} = v_{\text{PET}}^{\max} \cdot \frac{Fe_{\text{PS}}}{Fe_{\text{PS}} + k_{\text{Fe}}^{\text{PS}}} \cdot (1 - e^{-\alpha_i \cdot I}) \cdot e^{-\beta \cdot V_{\text{RP}}}, \quad (\text{S2})$$

where  $v_{\text{PET}}^{\max}$  [mol electron (mol C)<sup>-1</sup> s<sup>-1</sup>] is the maximal rate of PET,  $k_{\text{Fe}}^{\text{PS}}$  [ $\mu\text{mol Fe (mol C)}^{-1}$ ] is the half-saturating coefficient of  $Fe_{\text{PS}}$  for PET,  $\alpha_i$  ( $\mu\text{mol}^{-1} \text{m}^2 \text{s}$ ) is the initial slope of PET versus light curve, and  $\beta$  [mol C (mol C)<sup>-1</sup> s] represents the degree of the inhibition effect from RP on PET.

To calculate the rates of LPET and AET [ $V_{LPET}$  and  $V_{AET}$ , mol electron (mol C)<sup>-1</sup> s<sup>-1</sup>], the fraction of photosynthetic electrons flowing into AET ( $f_{AET}$ , dimensionless) is introduced in our model, and  $f_{AET}$  is calculated in each time step to fulfill the intracellular immediate requirement of ATP and NADPH <sup>4</sup>.

$$V_{LPET} = V_{PET} \cdot (1 - f_{AET}), \quad (S3)$$

$$V_{AET} = V_{PET} \cdot f_{AET}. \quad (S4)$$

The ATP production rate of PET [ $V_{ATP}$ , mol ATP (mol C)<sup>-1</sup> s<sup>-1</sup>] is contributed by both LPET and AET, and it is downregulated under OA <sup>22</sup>:

$$V_{ATP} = (V_{LPET} \cdot q_{LPET}^{ATP} + V_{AET} \cdot q_{AET}^{ATP}) \cdot 10^{OA^{PET} \cdot (pH - pH_{bsl})}, \quad (S5)$$

where  $q_{LPET}^{ATP} = q_{AET}^{ATP} = 0.65$  mol ATP (mol electron)<sup>-1</sup> are ratios of ATP to electron in LPET and AET <sup>8,9,26</sup>,  $OA^{PET}$  (dimensionless) denotes the degree of OA impact on the ATP production by PET,  $pH$  (dimensionless) represents the extracellular pH value at the cell surface, and  $pH_{bsl} = 8.08$  refers to the baseline pH value.

NADPH production by LPET is unlike ATP production, which is driven by the proton (H<sup>+</sup>) gradient between the lumen and stroma <sup>8,9</sup>. Therefore, its rate is assumed to be not impacted by the reduction in the pH value under OA:

$$V_{NAPDH} = V_{LPET} \cdot q_{LPET}^{NADPH}, \quad (S6)$$

where  $q_{LPET}^{NADPH} = 0.5$  mol NADPH (mol electron)<sup>-1</sup> is the ratio of NADPH to electron in LPET <sup>8</sup>.

The O<sub>2</sub> production rate [ $V_{O_2}$ , mol O<sub>2</sub> (mol C)<sup>-1</sup> s<sup>-1</sup>] is:

$$V_{O_2} = V_{LPET} \cdot q_{LPET}^{O_2}, \quad (S7)$$

where  $q_{LPET}^{O_2} = 0.25$  mol O<sub>2</sub> (mol electron)<sup>-1</sup> is the ratio of O<sub>2</sub> to electron in LPET <sup>8,9</sup>.

## 2. N<sub>2</sub> fixation

N<sub>2</sub> fixation requires both ATP and NADPH <sup>10,11</sup>. The maximal N<sub>2</sub> fixation rate [ $V_{NF}^{max}$ , mol N (mol C)<sup>-1</sup> s<sup>-1</sup>] is calculated based on the assumption that produced ATP and NADPH of PET completely sustain N<sub>2</sub> fixation.

$$V_{NF}^{max} = \frac{V_{ATP}}{q_{NF}^{ATP}}, \quad (S8)$$

219 where  $q_{NF}^{ATP} = 9 \text{ mol ATP (mol N)}^{-1}$  is ATP:N ratio in  $N_2$  fixation<sup>10,11</sup>.

220

221 The  $N_2$  fixation rate [ $V_{NF}$ ,  $\text{mol N (mol C)}^{-1} \text{ s}^{-1}$ ] is also regulated by the Fe quota in nitrogenase  
 222 [ $Fe_{NF}$ ,  $\mu\text{mol Fe (mol C)}^{-1}$ ] and inhibited by intracellular  $O_2$  [ $O_2$ ,  $\text{mol O}_2 \text{ m}^{-3}$ ]<sup>28</sup>. Under OA, the  
 223 reduced pH value (i.e., increased  $H^+$  concentration) lowers the efficiency of nitrogenase<sup>1,22</sup> while  
 224 the energy saved from CCM can benefit  $N_2$  fixation<sup>29</sup>.

$$V_{NF} = V_{NF}^{max} \cdot \frac{Fe_{NF}}{Fe_{NF} + k_{Fe}^{NF}} \cdot 10^{pH - pH_{bsl}} \cdot \left(1 - \frac{O_2}{O_2 + k_{O_2}^{NF}}\right) + V_{NF}^{CCM}, \quad (S9)$$

225 where  $k_{Fe}^{NF}$  [ $\mu\text{mol Fe (mol C)}^{-1}$ ] and  $k_{O_2}^{NF}$  ( $\text{mol O}_2 \text{ m}^{-3}$ ) are half-saturating coefficients of  $Fe_{NF}$  and  
 226  $O_2$  for  $N_2$  fixation,  $V_{NF}^{CCM}$  [ $\text{mol N (mol C)}^{-1} \text{ s}^{-1}$ ] represents the elevated  $N_2$  fixation rate driven by  
 227 CCM energy saving [ $V_{ATP}^{CCM, saving}$ ,  $\text{mol ATP (mol C)}^{-1} \text{ s}^{-1}$ ] under OA.

$$V_{NF}^{CCM} = \frac{V_{ATP}^{CCM, saving}}{q_{NF}^{ATP}} \cdot \frac{Fe_{NF}}{Fe_{NF} + k_{Fe}^{NF}} \cdot 10^{pH - pH_{bsl}} \cdot \left(1 - \frac{O_2}{O_2 + k_{O_2}^{NF}}\right). \quad (S10)$$

228

### 229 3. CO<sub>2</sub> concentrating mechanism

230 The energy consumption rate for CCM [ $V_{ATP}^{CCM}$ ,  $\text{mol ATP (mol C)}^{-1} \text{ s}^{-1}$ ] is calculated based on the  
 231 requirement of  $HCO_3^-$  for carbon fixation [ $V_{CF}$ ,  $\text{mol C (mol C)}^{-1} \text{ s}^{-1}$ ] and the cost for per  $HCO_3^-$   
 232 transportation [ $q_{HCO_3}^{ATP} = 0.5 \text{ mol ATP (mol C)}^{-1}$ ]<sup>1,13,30</sup>.

$$V_{ATP}^{CCM} = (V_{CF} - f_{RP}^{CF} \cdot V_{RP} - \frac{T_{CO_2}}{Q_C}) \cdot q_{CCM}^{ATP}, \quad (S11)$$

233 where  $V_{RP}$  [ $\text{mol C (mol C)}^{-1} \text{ s}^{-1}$ ] is the respiratory protection rate,  $f_{RP}^{CF}$  represents the fraction of  
 234 produced  $CO_2$  by respiratory protection to support carbon fixation,  $T_{CO_2}$  ( $\text{mol CO}_2 \text{ m}^{-3} \text{ s}^{-1}$ ) is the  
 235 diffusion rate of  $CO_2$  between cytoplasm and extracellular environment,  $Q_C = 18333 \text{ mol C m}^{-3}$   
 236 is the cellular carbon biomass quota<sup>15</sup>.

237

238 The elevation of  $CO_2$  concentration ( $CO_2$ ,  $\text{mol C m}^{-3}$ ) as seawater acidifies can lower the energy  
 239 need for CCM by reducing the requirement for  $HCO_3^-$ <sup>29,31-33</sup>:

$$V_{ATP}^{CCM, saving} = \left(\frac{T_{CO_2}}{Q_C} - \frac{T_{CO_2}^{bsl}}{Q_C}\right) \cdot q_{CCM}^{ATP} \quad (S12)$$

where  $T_{CO_2}^{bsl}$  (mol CO<sub>2</sub> m<sup>-3</sup> s<sup>-1</sup>) is the diffusion rate of CO<sub>2</sub> between cytoplasm and extracellular environment under baseline condition.

#### 4. Carbon fixation

Carbon fixation also requires both NADPH and ATP<sup>12</sup>, and consumption rates [ $V_{NADPH}^{CF}$  and  $V_{ATP}^{CF}$ , mol NADPH (mol C)<sup>-1</sup> s<sup>-1</sup> and mol ATP (mol C)<sup>-1</sup> s<sup>-1</sup>] are:

$$V_{NADPH}^{CF} = V_{CF} \cdot q_{CF}^{NADPH}, \quad (S13)$$

$$V_{ATP}^{CF} = V_{CF} \cdot q_{CF}^{ATP}. \quad (S14)$$

$V_{CF}$  is solved at each time step with  $f_{AET}$ , based on the consumption that total NADPH and ATP production by PET are immediately and fully utilized by intracellular process:

$$V_{NADPH} = V_{NADPH}^{CF} + V_{NADPH}^{NF}, \quad (S15)$$

$$V_{ATP} = (V_{ATP}^{CCM} + V_{ATP}^{CF} + V_{ATP}^{NF}) \cdot (1 + \gamma_{MT}), \quad (S16)$$

where  $\gamma_{MT}$  (dimensionless) represents the ratio of ATP consumption by maintenance to other processes<sup>1</sup>.

The carbon skeleton production rate [ $V_{CS}$ , mol C (mol C)<sup>-1</sup> s<sup>-1</sup>] is stimulated by carbohydrate [ $CH_2O$ , mol C (mol C)<sup>-1</sup>] and downregulated by its own accumulation [ $CS$ , mol C (mol C)<sup>-1</sup>]:

$$V_{CS} = v_{CS}^{max} \cdot \frac{CH_2O}{CH_2O + k_{CH_2O}^{CS}} \cdot \frac{CS_{max} - CS}{CS_{max}}, \quad (S17)$$

where  $v_{CS}^{max}$  [mol C (mol C)<sup>-1</sup> s<sup>-1</sup>] is the maximal production rate of the carbon skeleton,  $k_{CH_2O}^{CS}$  [mol C (mol C)<sup>-1</sup>] is the half-saturation constant of carbohydrates for carbon skeleton production, and  $CS_{max}$  [mol C (mol C)<sup>-1</sup>] is the maximum CS storage.

#### 5. Respiratory protection

Respiratory protection rate is regulated by the requirement of N<sub>2</sub> fixation and intracellular O<sub>2</sub><sup>4,5,34</sup>:

$$V_{RP} = v_{RP}^{max} \cdot (1 - e^{-\alpha_i \cdot I}) \cdot \frac{CS}{CS + k_{CS}} \cdot \left( \frac{N_{max} - N}{N_{max}} \right) \cdot \frac{O_2}{O_2 + k_{O_2}^{NF}}, \quad (S18)$$

where  $v_{RP}^{max}$  [mol C (mol C)<sup>-1</sup> s<sup>-1</sup>] is the maximal respiratory protection rate,  $k_{CS}$  [mol C (mol C)<sup>-1</sup>] is the half-saturating coefficient of the carbon skeleton for respiratory protection, and  $N_{max}$  [mol N (mol C)<sup>-1</sup>] is the maximal N storage.

264 The O<sub>2</sub> consumption by RP [ $V_{O_2}^{RP}$ , mol O<sub>2</sub> (mol C)<sup>-1</sup> s<sup>-1</sup>] is:

$$V_{O_2}^{RP} = V_{RP} \cdot q_C^{O_2}, \quad (S19)$$

265 where  $q_C^{O_2}$  [mol O<sub>2</sub> (mol C)<sup>-1</sup>] is the ratio of O<sub>2</sub> to carbon in carbohydrate respiration.

266

## 267 6. O<sub>2</sub> and CO<sub>2</sub> diffusion

268 The rate of O<sub>2</sub> diffusion ( $T_{O_2}$ , mol O<sub>2</sub> m<sup>-3</sup> s<sup>-1</sup>) between the intracellular cytoplasm and the

269 extracellular environment is parameterized by adopting the scheme in Staal, et al. <sup>35</sup>:

$$T_{O_2} = \frac{-2 \cdot \pi \cdot d_{O_2} \cdot L}{V} \cdot \left\{ \frac{1}{\varepsilon} \cdot \ln \left( \frac{R}{R + L_g} \right) - \ln \left( \frac{R + L_g + L_b}{R + L_g} \right) \right\}^{-1} \cdot (O_2^E - O_2), \quad (S20)$$

270 where  $d_{O_2}$  (m<sup>2</sup> s<sup>-1</sup>) is the O<sub>2</sub> diffusion coefficient in seawater,  $\varepsilon$  (dimensionless) is the ratio of the

271 O<sub>2</sub> diffusion coefficient of the cell membrane relative to  $d_{O_2}$ ,  $L$  (m) and  $V$  (m<sup>3</sup>) are the length and

272 the volume of the trichome,  $R$  (m) is the radius of the cytoplasm,  $L_g$  (m) is the thickness of the

273 cell membrane,  $L_b$  (m) is the thickness of the boundary layer,  $O_2^E$  is the extracellular far-field O<sub>2</sub>

274 concentration.

275

276 The CO<sub>2</sub> diffusion rate between cytoplasm and extracellular environment is

$$T_{CO_2} = \frac{-2 \cdot \pi \cdot d_{CO_2} \cdot L}{V} \cdot \left\{ \frac{1}{\varepsilon_{CO_2}} \cdot \ln \left( \frac{R}{R + L_g} \right) - \ln \left( \frac{R + L_g + L_b}{R + L_g} \right) \right\}^{-1} \cdot CO_2^E, \quad (S21)$$

277 where  $d_{CO_2}$  (m<sup>2</sup> s<sup>-1</sup>) is the CO<sub>2</sub> diffusion coefficient in seawater,  $\varepsilon_{CO_2}$  (dimensionless) is the ratio

278 of the CO<sub>2</sub> diffusion coefficient of the cell membrane relative to  $d_{CO_2}$ ,  $CO_2^E$  is the extracellular

279 far-field CO<sub>2</sub> concentration. CO<sub>2</sub> concentration in the cytoplasm was not simulated but set 0

280 based on the assumption that CO<sub>2</sub> in the cytoplasm was assumed to be quickly transferred into

281 carboxysome or leak into extracellular environment.

282

283  $T_{CO_2}^{bsl}$  is calculated based on the extracellular far-field CO<sub>2</sub> concentration under baseline

284 condition:

$$T_{CO_2}^{bsl} = \frac{-2 \cdot \pi \cdot d_{CO_2} \cdot L}{V} \cdot \left\{ \frac{1}{\varepsilon_{CO_2}} \cdot \ln \left( \frac{R}{R + L_g} \right) - \ln \left( \frac{R + L_g + L_b}{R + L_g} \right) \right\}^{-1} \cdot CO_{2,bsl}^E. \quad (S22)$$

285

## 7. Intracellular Fe pools and translocation

*Trichodesmium* can uptake more Fe than that required by its metabolism (called “luxury uptake”) particularly under high-Fe conditions, and the excess Fe is stored to enable the survival in low-iron environments<sup>36,37</sup>. Therefore, the total intracellular Fe quota [ $Fe$ ,  $\mu\text{mol Fe (mol C)}^{-1}$ ] consists of Fe in metabolism and storage [ $Fe_M$  and  $Fe_{ST}$ ,  $\mu\text{mol Fe (mol C)}^{-1}$ ], calculated based on the threshold level of Fe [ $Fe_{TH}$ ,  $\mu\text{mol Fe (mol C)}^{-1}$ ]<sup>1</sup>:

$$Fe_{TH} = Fe_{TH}^{bsl} \cdot [1 + OA^{ST} \cdot (10^{pH_{bsl} - pH} - 1)], \quad (S23)$$

$$Fe_M = Fe, \quad \text{when } Fe \leq Fe_{TH}, \quad (S24)$$

$$Fe_M = Fe_{TH} + (1 - f_{ST}) \cdot (Fe - Fe_{TH}), \text{ when } Fe > Fe_{TH}, \quad (S25)$$

where  $Fe_{TH}^{bsl}$  [ $\mu\text{mol Fe (mol C)}^{-1}$ ] is the threshold level of Fe under the baseline condition,  $OA^{ST}$  (dimensionless) is the coefficient representing the strength of OA impact on  $Fe_{TH}$ ,  $f_{ST}$  (dimensionless) is the fraction of luxury Fe uptake.

Fe allocations are among  $Fe_M$ , including Fe in photosystems, active nitrogenase, inactivated nitrogenase, maintenance and buffer [ $Fe_{PS}$ ,  $Fe_{NF}$ ,  $Fe_{NF}^{NA}$ ,  $Fe_{MT}$  and  $Fe_{BF}$ ,  $\mu\text{mol Fe (mol C)}^{-1}$ ]. Fe in maintenance is set diurnally constant at 10% of  $Fe_M$  under ambient and acidified conditions<sup>1</sup>. Fe used in the photosystems and nitrogenase is from the buffer pool<sup>34</sup>.

Ocean acidification seemingly does not affect the general diurnal patterns of both  $Fe_{PS}$  and  $Fe_{NF}$  but their initial levels at the beginning of the light period<sup>18</sup>, predefined in our model using observations<sup>18</sup>. The differences in the absolute amount of  $Fe_{PS}$  or  $Fe_{NF}$  between ambient and acidified conditions<sup>18</sup> were represented in the optimized maximal Fe translocation rates of photosystems or nitrogenase (Supplementary Table 5), which ensured optimal intracellular Fe allocations to achieve the maximal growth rate<sup>3</sup>.

The synthesis rate of photosystems [ $T_{PS}^{BF}$ ,  $\mu\text{mol Fe (mol C)}^{-1} \text{ s}^{-1}$ ] is stimulated by light intensity and gradually saturated with  $Fe_{PS}$ :

$$T_{PS}^{BF} = T_{PS_{max}}^{BF} \cdot (1 - e^{-\alpha \cdot I}) \cdot (1 - \frac{Fe_{PS}}{Fe_{PS} + k_{Fe_{PS}}^{PS_{syn}}}), \quad (S26)$$

where  $T_{PS_{max}}^{BF}$  [ $\mu\text{mol Fe (mol C)}^{-1} \text{ s}^{-1}$ ] is the maximal synthesis rate of photosystems,  $k_{Fe_{PS}}^{PS_{syn}}$  [ $\mu\text{mol Fe (mol C)}^{-1}$ ] is the half-saturating coefficients of  $Fe_{PS}$  for the synthesis of photosystems.



312 The decomposition rate of photosystems [ $T_{BF}^{PS}$ ,  $\mu\text{mol Fe (mol C)}^{-1} \text{ s}^{-1}$ ] is stimulated by  $Fe_{PS}$  but  
 313 inhibited by respiratory protection <sup>27</sup>:

$$T_{BF}^{PS} = T_{BF_{max}}^{PS} \cdot \frac{Fe_{PS}}{Fe_{PS} + k_{Fe_{PS}}^{PS_{dec}}} \cdot e^{-\beta \cdot V_{RP}}, \quad (\text{S27})$$

314 where  $T_{BF_{max}}^{PS}$  [ $\mu\text{mol Fe (mol C)}^{-1} \text{ s}^{-1}$ ] is the maximal decomposition rate of photosystems,  $k_{Fe_{PS}}^{PS_{dec}}$   
 315 [ $\mu\text{mol Fe (mol C)}^{-1}$ ] is the half-saturating coefficient of  $Fe_{PS}$  for the decomposition of  
 316 photosystems. Fe released from decomposed photosystems returns to buffer pool <sup>34</sup>.

317

318 The nitrogenase synthesis rate [ $T_{NF}^{BF}$ ,  $\mu\text{mol Fe (mol C)}^{-1} \text{ s}^{-1}$ ] is:

$$\Phi = (1 - e^{-\alpha_i \cdot I}) \cdot \frac{CS}{CS + k_{CS}} \cdot \left( \frac{N_{max} - N}{N_{max}} \right), \quad (\text{S28})$$

$$T_{NF}^{BF} = T_{NF_{max}}^{BF} \cdot \Phi \cdot \frac{Fe_{BF}}{Fe_{BF} + k_{Fe_{BF}}^{NF_{syn}}}, \quad (\text{S29})$$

319 where  $\Phi$  represents the intracellular requirement of  $N_2$  fixation,  $T_{NF_{max}}^{BF}$  [ $\mu\text{mol Fe (mol C)}^{-1} \text{ s}^{-1}$ ] is  
 320 the maximal nitrogenase synthesis rate,  $k_{CS}$  [ $\text{mol C (mol C)}^{-1}$ ] and  $k_{Fe_{BF}}^{NF_{syn}}$  [ $\mu\text{mol Fe (mol C)}^{-1}$ ] are  
 321 half-saturating coefficients of the carbon skeleton and  $Fe_{BF}$  for the synthesis of nitrogenase,  
 322 respectively,  $N_{max}$  [ $\text{mol N (mol C)}^{-1}$ ] is the maximal N storage. Note that the requirement of  $N_2$   
 323 fixation ( $\Phi$ ) is assumed to be stimulated by the increase of light and the production of CS  
 324 stimulates but be suppressed by the accumulation of fixed N lowers the requirement.

325

326 The decomposition of nitrogenase seems to occur at night <sup>18,38</sup>, and therefore it is not considered  
 327 during the light period in our model. Notably, nitrogenase is inhibited upon exposure to  $O_2$ ,  
 328 flowing into the pool of inactivated nitrogenase <sup>27</sup> at the rate [ $T_{NF}^{NA}$ ,  $\mu\text{mol Fe (mol C)}^{-1} \text{ s}^{-1}$ ]:

$$T_{NF}^{NA} = T_{NF_{max}}^{NA} \cdot \frac{Fe_{NF}}{Fe_{NF} + k_{Fe}^{NF}} \cdot \frac{O_2}{O_2 + k_{O_2}^{NF}}, \quad (\text{S30})$$

329 where  $T_{NF_{max}}^{NA}$  [ $\mu\text{mol Fe (mol C)}^{-1} \text{ s}^{-1}$ ] is the maximal inactivation rate of nitrogenase.

330

331 Note that The Fe in nitrogenase and photosystems from Shi, et al. <sup>18</sup> were estimated from  
 332 observed protein content, based on Fe atoms in per protein. PSII, Cyt *b6f*, PSI and Ferredoxin  
 333 together represents photosystems. Cyt *b6f* and Ferredoxin were not measured in Shi, et al. <sup>18</sup> but  
 334 estimated by assuming Cyt *b6f*:PSII = 1:1 in Fe quota and Ferredoxin:PSI = 1:1 in protein  
 335 content. Further details are in the supplementary information in <sup>1</sup>.

## 8. Integration of state variables during the daytime

The diurnal change rates (basically normalized to carbon biomass) of  $\text{CH}_2\text{O}$ , CS, N, intracellular  $\text{O}_2$  and Fe are represented in ordinary differential equations (ODEs). Note that  $\text{O}_2$  is in a unit volumetric concentration ( $\text{mol O}_2 \text{ m}^{-3}$ ):

$$\frac{d\text{CH}_2\text{O}}{dt} = V_{CF} - V_{CS} - V_{RP}, \quad (\text{S31})$$

$$\frac{d\text{CS}}{dt} = V_{CS}, \quad (\text{S32})$$

$$\frac{d\text{N}}{dt} = V_{NF}, \quad (\text{S33})$$

$$\frac{d\text{O}_2}{dt} = (V_{\text{O}_2} - V_{\text{O}_2}^{\text{RP}}) \cdot Q_C + T_{\text{O}_2}, \quad (\text{S34})$$

$$\frac{d\text{Fe}_{PS}}{dt} = T_{PS}^{\text{BF}} - T_{BF}^{\text{PS}}, \quad (\text{S35})$$

$$\frac{d\text{Fe}_{NF}}{dt} = T_{NF}^{\text{BF}} - T_{NF}^{\text{NA}}, \quad (\text{S36})$$

$$\frac{d\text{Fe}_{NF}^{\text{NA}}}{dt} = T_{NF}^{\text{NA}}, \quad (\text{S37})$$

$$\frac{d\text{Fe}_{BF}}{dt} = T_{BF}^{\text{PSI}} - T_{PSI}^{\text{BF}} + T_{NF}^{\text{BF}}. \quad (\text{S38})$$

ODEs are run over a 12-hour light period with ode15s integrator of MATLAB<sup>39</sup>.

## 9. Biosynthesis and growth rate

*Trichodesmium* might store newly fixed C and N during the daytime and assimilate them into biomass mainly during the dark period<sup>40</sup>. Therefore, for simplification, no biomass synthesis occurs during the light period in the model. Instead, the model calculates the amount of biomass [ $\text{Bio}$ ,  $\text{mol C (mol C)}^{-1}$ ] that can be synthesized using the carbohydrates, carbon skeletons and fixed N at the end of the light period.  $\text{Bio}$  is the smaller value of N-based ( $\text{Bio}_N$ ) and C-based biomass ( $\text{Bio}_C$ ), with  $\text{Bio}_N$  calculated by dividing fixed N to the molar N:C (0.159)<sup>17</sup>.  $\text{Bio}_C$  is calculated from the carbohydrates and carbon skeleton considering mass and energy balance. Notably, like PET, the impact of OA on the energy production by respiration is considered.

The energy needed for biosynthesis is from the respiration of carbohydrates ( $\text{CH}_2\text{O}_{\text{BIO}}^{\text{RESP}}$ ):

$$\text{Bio}_C \cdot q_{\text{BIO}}^{\text{ATP}} \cdot (1 + \gamma_{\text{MT}}) = \text{CH}_2\text{O}_{\text{BIO}}^{\text{RESP}} \cdot q_{\text{RESP}}^{\text{ATP}} \cdot 10^{\text{OA}^{\text{RESP}} \cdot (\text{pH} - \text{pH}_{\text{bsl}})}, \quad (\text{S39})$$

where  $q_{\text{BIO}}^{\text{ATP}} = 2 \text{ mol ATP (mol C)}^{-1}$  is the ATP requirement rate by biosynthesis<sup>5</sup>, and  $q_{\text{RESP}}^{\text{ATP}} = 5 \text{ mol ATP (mol C)}^{-1}$  is the ATP production rate from respiring carbohydrates<sup>14</sup>,  $\text{OA}^{\text{RESP}}$  (dimensionless) represents the strength of OA impact on the ATP production by respiration at

night. Given that the respiratory electron transfer chain shares the apparatuses in the PET chain and its energy production is also driven by the proton gradient <sup>41</sup>,  $OA^{RESP}$  is set the same as  $OA^{PET}$ .

Meanwhile, the non-respired carbohydrates and all the carbon skeletons are involved in biosynthesis:

$$Bio_C = CH_2O - CH_2O_{BIO}^{RESP} + CS. \quad (S40)$$

$Bio_C$  then can be solved from the above two equations. Note that the carbohydrate respiration calculated in this step is counted in the daily integrated respiration as the ordinary respiration.

Noting that all the rates have been normalized to carbon biomass,  $Bio$  is therefore the relative increase in biomass over one day. The growth rate ( $G$ ) is then the natural log of  $(1 + Bio)$  divided by 1 day.

#### 10. Colony model framework

The colony is modeled as a porous sphere (the radius,  $R_C = 800 \mu m$ ), exhibiting spatially variable porosity with the variable porosity  $[\psi(r)$ , dimensionless] from the center to the edge of colony <sup>2</sup>. The porosity  $[\psi(r)]$  is calculated as the ratio of the non-biological volume to the sum of non-biological and biological volumes at the location, from which to the center of colony the radial distance is  $r$  (m), using the scheme in Klawonn, et al. <sup>2</sup>:

$$\psi(r) = 1 - 1.7141 \times 10^{-3} \cdot [1 + \tanh(2 - (2r/R_C - 0.6)/0.3)]. \quad (S41)$$

Biological processes within the colony are parameterized similar to those in the single trichome model described above. Note that the light intensity in the colony  $[I(t, r), \mu mol m^{-2} s^{-1}]$  is designed by multiplying  $I(t)$  (see description about the trichome model above) with  $\psi(r)$ . Considering that there might be DIC limitation for carbon fixation of colony especially at the center, we introduced the parameter ( $\eta$ , dimensionless) to evaluate the strength of DIC limitation effect.  $\eta$  is regulated by the concentration of  $CO_2$  and  $HCO_3^-$  in the microenvironment of colony:

$$\eta(r) = \min \left\{ \frac{CO_2^M(r) + HCO_3^M(r)}{CO_{2,bsl}^E + HCO_{3,bsl}^E}, 1 \right\}, \quad (S42)$$

where  $\text{HCO}_3^E_{3,bsl}$  is the extracellular far-field  $\text{HCO}_3^-$  concentration ( $\text{mol C m}^{-3}$ ). The carbon fixation of colony could be calculated based on ATP- and NADPH-dependent carbon fixation (*see above*) and  $\eta$ .

In the non-biological microenvironment of the colony, concentrations of  $\text{O}_2$  [ $O_2^M(r)$ ,  $\text{mol O}_2 \text{ m}^{-3}$ ],  $\text{CO}_2$  [ $CO_2^M(r)$ ,  $\text{mol C m}^{-3}$ ],  $\text{HCO}_3^-$  [ $HCO_3^M(r)$ ,  $\text{mol C m}^{-3}$ ],  $\text{CO}_3^{2-}$  [ $CO_3^M(r)$ ,  $\text{mol C m}^{-3}$ ],  $\text{H}^+$  [ $H^M(r)$ ,  $\text{mol H}^+ \text{ m}^{-3}$ ], and  $\text{OH}^-$  [ $OH^M(r)$ ,  $\text{mol OH}^- \text{ m}^{-3}$ ] are simulated at the radical distance  $r$  ( $\leq R_C$ ). These concentrations are controlled by the physical diffusion, extracellular chemical reactions of carbonate system, and intracellular biological processes (e.g., net uptake or release). Therefore, their changing rates with time ( $t$ ) and radical distance ( $r$ ) can be represented using diffusion-reaction equations:

$$\frac{\partial O_2^M(r)}{\partial t} \cdot \psi(r) = \frac{1}{r^2} \cdot \frac{\partial}{\partial r} \left\{ r^2 \cdot [d_{O_2} \cdot \psi(r)] \cdot \frac{\partial O_2^M(r)}{\partial r} \right\} - T_{C, O_2}^M(r) \cdot [1 - \psi(r)], \quad (\text{S43})$$

$$\frac{\partial CO_2^M(r)}{\partial t} \cdot \psi(r) = \frac{1}{r^2} \cdot \frac{\partial}{\partial r} \left\{ r^2 \cdot [d_{CO_2} \cdot \psi(r)] \cdot \frac{\partial CO_2^M(r)}{\partial r} \right\} + J_{CO_2^M}(r) \cdot \psi(r) - T_{C, CO_2}^M(r) \cdot [1 - \psi(r)], \quad (\text{S44})$$

$$\frac{\partial HCO_3^M(r)}{\partial t} \cdot \psi(r) = \frac{1}{r^2} \cdot \frac{\partial}{\partial r} \left\{ r^2 \cdot [d_{HCO_3} \cdot \psi(r)] \cdot \frac{\partial HCO_3^M(r)}{\partial r} \right\} + J_{HCO_3^M}(r) \cdot \psi(r) - T_{C, HCO_3}^M(r) \cdot [1 - \psi(r)], \quad (\text{S45})$$

$$\frac{\partial CO_3^M(r)}{\partial t} \cdot \psi(r) = \frac{1}{r^2} \cdot \frac{\partial}{\partial r} \left\{ r^2 \cdot [d_{CO_3^{2-}} \cdot \psi(r)] \cdot \frac{\partial CO_3^M(r)}{\partial r} \right\} + J_{CO_3^M}(r) \cdot \psi(r), \quad (\text{S46})$$

$$\frac{\partial H^M(r)}{\partial t} \cdot \psi(r) = \frac{1}{r^2} \cdot \frac{\partial}{\partial r} \left\{ r^2 \cdot [d_{H^+} \cdot \psi(r)] \cdot \frac{\partial H^M(r)}{\partial r} \right\} + J_{H^M}(r) \cdot \psi(r) - T_{C, H}^M(r) \cdot [1 - \psi(r)], \quad (\text{S47})$$

$$\frac{\partial OH^M(r)}{\partial t} \cdot \psi(r) = \frac{1}{r^2} \cdot \frac{\partial}{\partial r} \left\{ r^2 \cdot [d_{OH^-} \cdot \psi(r)] \cdot \frac{\partial OH^M(r)}{\partial r} \right\} + J_{OH^M}(r) \cdot \psi(r). \quad (\text{S48})$$

where  $d_{O_2}$ ,  $d_{CO_2}$ ,  $d_{HCO_3^-}$ ,  $d_{H^+}$  and  $d_{OH^-}$  are the diffusion coefficients of  $\text{O}_2$ ,  $\text{CO}_2$ ,  $\text{HCO}_3^-$ ,  $\text{H}^+$  and  $\text{OH}^-$  in seawater, respectively. Note that  $J$  represents the flux driven by the chemical reactions in microenvironmental carbonate systems, and  $T$  denotes the flux interreacted with intracellular concentrations or processes, both of which are described later.  $M$  denotes the microenvironment.

The change rates of  $\text{CO}_2$  [ $J_{CO_2^M}(r)$ ,  $\text{mol C m}^{-3} \text{ s}^{-1}$ ],  $\text{HCO}_3^-$  [ $J_{HCO_3^M}(r)$ ,  $\text{mol C m}^{-3}$ ],  $\text{CO}_3^{2-}$  [ $J_{CO_3^M}(r)$ ,  $\text{mol C m}^{-3}$ ],  $\text{H}^+$  [ $J_{H^M}(r)$ ,  $\text{mol H}^+ \text{ m}^{-3}$ ], and  $\text{OH}^-$  [ $J_{OH^M}(r)$ ,  $\text{mol OH}^- \text{ m}^{-3}$ ], driven by the chemical reactions in carbonate systems, are:

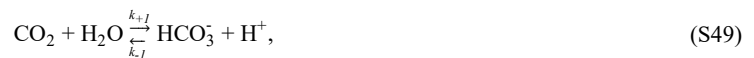

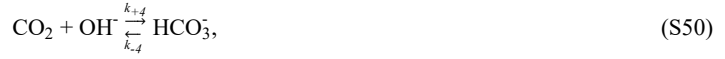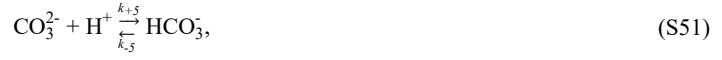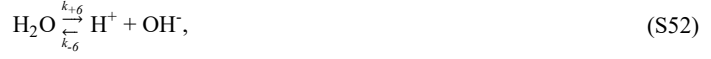

$$J_{\text{CO}_2^M}(r) = [k_{-1} \cdot H^M(r) \cdot \text{HCO}_3^M(r) - k_{+1} \cdot \text{CO}_2^M(r)] + [k_{-4} \cdot \text{HCO}_3^M(r) - k_{+4} \cdot \text{OH}^M(r) \cdot \text{CO}_2^M(r)], \quad (\text{S53})$$

$$J_{\text{HCO}_3^M}(r) = [-k_{-1} \cdot H^M(r) \cdot \text{HCO}_3^M(r) + k_{+1} \cdot \text{CO}_2^M(r)] + [-k_{-4} \cdot \text{HCO}_3^M(r) + k_{+4} \cdot \text{OH}^M(r) \cdot \text{CO}_2^M(r)] \\ + [k_{+5} \cdot H^M(r) \cdot \text{CO}_3^M(r) - k_{-5} \cdot \text{HCO}_3^M(r)], \quad (\text{S54})$$

$$J_{\text{CO}_3^M}(r) = [k_{-5} \cdot \text{HCO}_3^M(r) - k_{+5} \cdot H^M(r) \cdot \text{CO}_3^M(r)], \quad (\text{S55})$$

$$J_{\text{H}^M}(r) = [-k_{-1} \cdot H^M(r) \cdot \text{HCO}_3^M(r) + k_{+1} \cdot \text{CO}_2^M(r)] + [k_{-5} \cdot \text{HCO}_3^M(r) - k_{+5} \cdot H^M(r) \cdot \text{CO}_3^M(r)] \\ + [-k_{-6} \cdot H^M(r) \cdot \text{OH}^M(r) + k_{+6}], \quad (\text{S56})$$

$$J_{\text{OH}^M}(r) = [k_{-4} \cdot \text{HCO}_3^M(r) - k_{+4} \cdot \text{OH}^M(r) \cdot \text{CO}_2^M(r)] + [-k_{-6} \cdot H^M(r) \cdot \text{OH}^M(r) + k_{+6}], \quad (\text{S57})$$

where  $k$  represents the reaction rate coefficient, and its subscript with positive or negative number represents the forward or reverse reaction, respectively.

The  $\text{O}_2$  diffusion rate [ $T_{C, \text{O}_2}^M(r)$ , mol  $\text{O}_2 \text{ m}^{-3} \text{ s}^{-1}$ ] between the intracellular cytoplasm and the extracellular microenvironment is:

$$T_{C, \text{O}_2}^M(r) = \frac{-2 \cdot \pi \cdot d_{\text{O}_2} \cdot L}{V} \cdot \left\{ \frac{1}{\varepsilon} \cdot \ln \left( \frac{R}{R + L_g} \right) \right\}^{-1} \cdot [\text{O}_2^M(r) - \text{O}_2(r)]. \quad (\text{S58})$$

Considering the complexity of intracellular carbonate system with diffusion between cytoplasm and carboxysome, for simplification, the concentration of DIC and the reactions of carbonate system are not simulated in the intracellular cytoplasm as mentioned above. The exchange rates of  $\text{CO}_2$  [ $T_{C, \text{CO}_2}^M(r)$ , mol C  $\text{m}^{-3} \text{ s}^{-1}$ ] was regulated by the  $\text{CO}_2$  diffusion flux from

microenvironment into cytoplasm [ $\frac{-2 \cdot \pi \cdot d_{\text{CO}_2} \cdot L}{V} \cdot \left\{ \frac{1}{\varepsilon_{\text{CO}_2}} \cdot \ln \left( \frac{R}{R + L_g} \right) \right\}^{-1} \cdot \text{CO}_2^M(r)$ ] and leakage flux into

microenvironment  $[(1 - f_{RP}^{CF}) \cdot V_{RP}(r)]$ . The exchange rate of  $\text{HCO}_3^-$  [ $T_{C, \text{HCO}_3}^M(r)$ , mol C  $\text{m}^{-3} \text{ s}^{-1}$ ] was based on the requirement of  $\text{HCO}_3^-$  to support carbon fixation. The exchange rate of  $\text{HCO}_3^-$  [ $T_{C, H}^M(r)$ , mol  $\text{H}^+ \text{ m}^{-3} \text{ s}^{-1}$ ] was the same as  $T_{C, \text{HCO}_3}^M(r)$  <sup>7</sup>:

$$T_{C, \text{CO}_2}^M(r) = \frac{\frac{-2 \cdot \pi \cdot d_{\text{CO}_2} \cdot L}{V} \cdot \left\{ \frac{1}{\varepsilon_{\text{CO}_2}} \cdot \ln \left( \frac{R}{R + L_g} \right) \right\}^{-1} \cdot \text{CO}_2^M(r)}{Q_C} - (1 - f_{RP}^{CF}) \cdot V_{RP}(r), \quad (\text{S59})$$

$$T_{C, HCO_3}^M(r) = V_{CF}(r) - f_{RP}^{CF} \cdot V_{RP}(r) - \frac{\frac{-2 \cdot \pi \cdot d_{CO_2} \cdot L}{V} \cdot \left\{ \frac{1}{\varepsilon_{CO_2}} \cdot \ln \left( \frac{R}{R + L_g} \right) \right\}^{-1} \cdot CO_2^M(r)}{Q_C}, \quad (S60)$$

$$T_{C, H}^M(r) = T_{C, HCO_3}^M(r). \quad (S61)$$

## 11. Model experiments with ammonia and copper toxicity

Ammonia (NH<sub>3</sub>) and/or copper (Cu) toxicity can impact the response of the trichome to ocean acidification<sup>22</sup>. Furthermore, previous study reported that the colony could also create a chemical gradient of NH<sub>4</sub><sup>+</sup> and copper from the center to the edge<sup>2,42</sup>. Accordingly, we conducted model experiments that incorporated the toxic effects of NH<sub>3</sub> and/or Cu into the models for both trichome and colony.

Considering that NH<sub>3</sub> and/or Cu can inhibit photosystem II activity and photosynthetic ATP production<sup>22,43</sup>, we hypothesized that that NH<sub>3</sub> and/or Cu toxicity would negatively affect the ATP production by the photosynthetic electron transfer chain. This effect ( $\xi$ , dimensionless) is regulated by extracellular NH<sub>3</sub> and/or dissolved inorganic Cu concentration with pH level:

$$\xi = 1 - \frac{NH_3}{NH_3 + k_{NH_3}} \cdot \frac{Cu}{Cu + k_{Cu}} \cdot 10^{OA^{Cu} \cdot (pH - pH_{bsl})}, \quad (S62)$$

where  $k_{NH_3} = 3 \times 10^{-5}$  mol N m<sup>-3</sup> and  $k_{Cu} = 2.5 \times 10^{-7}$  mol Cu m<sup>-3</sup> are the half-saturating coefficient of NH<sub>3</sub> and Cu concentrations for the toxic effect, and  $OA^{Cu} = 1.65$  represents the strength of negative effect from acidification on copper availability.

The concentration of NH<sub>3</sub> was calculated based on the pH level, NH<sub>4</sub><sup>+</sup> concentration, and the equilibrium constant for the chemical reaction between NH<sub>3</sub> and NH<sub>4</sub><sup>+</sup>. In the colony model, microenvironmental NH<sub>4</sub><sup>+</sup> concentration profile was predefined according to the findings of Klawonn, et al.<sup>2</sup>. The pattern of microenvironmental Cu was set the same as that of NH<sub>4</sub><sup>+</sup>, with the highest concentration (1 nmol L<sup>-1</sup>) at the center of the colony. This concentration selection is supported by observations from Wang, et al.<sup>42</sup>.

Given an approximate colony volume of ~1  $\mu$ L, dust loads of 0.2–1  $\mu$ g per colony yield an effective dust concentration of 200–1,000 mg/L<sup>42</sup>. In situ observations of puff-shaped colonies indicate that each colony typically contains less than 200 ng of dust, corresponding to ~200 mg/L<sup>42</sup>. Based on these estimations and relationship between dust and Cu concentrations<sup>42</sup>, a Cu

443 concentration of 1 nmol L<sup>-1</sup> could be considered a conservative estimate. Additionally,  
444 observations of trichome growth in YBC-II media with 1 nmol L<sup>-1</sup> Cu have likely demonstrated  
445 toxic effects<sup>22</sup>, further supporting the relevance of this concentration for the colony model  
446 experiments.  
447

## SUPPLEMENTAL REFERENCES

1. Luo, Y.W. *et al.* Reduced nitrogenase efficiency dominates response of the globally important nitrogen fixer *Trichodesmium* to ocean acidification. *Nature Communications* **10**, 1521 (2019).
2. Klawonn, I. *et al.* Distinct nitrogen cycling and steep chemical gradients in *Trichodesmium* colonies. *The ISME Journal* **14**, 399-412 (2020).
3. Luo, W. & Luo, Y.-W. Diurnally dynamic iron allocation promotes N<sub>2</sub> fixation in marine dominant diazotroph *Trichodesmium*. *Computational and Structural Biotechnology Journal* **21**, 3503-3512 (2023).
4. Luo, W., Inomura, K., Zhang, H. & Luo, Y.-W. N<sub>2</sub> fixation in *Trichodesmium* does not require spatial segregation from photosynthesis. *mSystems* **7**, e00538-22 (2022).
5. Inomura, K., Wilson, S.T. & Deutsch, C. Mechanistic model for the coexistence of nitrogen fixation and photosynthesis in marine *Trichodesmium*. *mSystems* **4**, e00210-19 (2019).
6. Benson, B.B. & Krause, D. The concentration and isotopic fractionation of oxygen dissolved in freshwater and seawater in equilibrium with the atmosphere. *Limnology and Oceanography* **29**, 620-632 (1984).
7. Wolf-Gladrow, D. & Riebesell, U. Diffusion and reactions in the vicinity of plankton: A refined model for inorganic carbon transport. *Marine Chemistry* **59**, 17-34 (1997).
8. Allen, J.F. Cyclic, pseudocyclic and noncyclic photophosphorylation: New links in the chain. *Trends in Plant Science* **8**, 15-19 (2003).
9. Geider, R.J., Moore, C.M. & Ross, O.N. The role of cost-benefit analysis in models of phytoplankton growth and acclimation. *Plant Ecology and Diversity* **2**, 165-178 (2009).
10. Flores, E. & Herrero, A. Assimilatory nitrogen metabolism and its regulation. in *The Molecular Biology of Cyanobacteria* (ed. Bryant, D.A.) 487-517 (Kluwer Academic Publishers, Dordrecht, 1994).
11. Flores, E., Frías, J.E., Rubio, L.M. & Herrero, A. Photosynthetic nitrate assimilation in cyanobacteria. *Photosynthesis Research* **83**, 117-133 (2005).
12. Baker, N.R., Harbinson, J. & Kramer, D.M. Determining the limitations and regulation of photosynthetic energy transduction in leaves. *Plant Cell and Environment* **30**, 1107-1125 (2007).
13. Raven, J.A., Beardall, J. & Giordano, M. Energy costs of carbon dioxide concentrating mechanisms in aquatic organisms. *Photosynthesis Research* **121**, 111-124 (2014).
14. Mitchell, P. Aspects of the chemiosmotic hypothesis. *Biochemical Journal* **116**, 5-6 (1970).
15. Bratbak, G. & Dundas, I. Bacterial dry matter content and biomass estimations. *Applied and Environmental Microbiology* **48**, 755-757 (1984).
16. Carpenter, E.J. *et al.* The tropical diazotrophic phytoplankton *Trichodesmium*: Biological characteristics of two common species. *Marine Ecology Progress Series* **95**, 295-304 (1993).
17. LaRoche, J. & Breitbarth, E. Importance of the diazotrophs as a source of new nitrogen in the ocean. *Journal of Sea Research* **53**, 67-91 (2005).
18. Shi, D., Kranz, S.A., Kim, J.M. & Morel, F.M. Ocean acidification slows nitrogen fixation and growth in the dominant diazotroph *Trichodesmium* under low-iron conditions. *Proceedings of the National Academy of Sciences of the United States of America* **109**, E3094-100 (2012).
19. Shao, Z. *et al.* Global oceanic diazotroph database version 2 and elevated estimate of global oceanic N<sub>2</sub> fixation. *Earth System Science Data* **15**, 3673-3709 (2023).



- 494 20. Capone, D.G., Zehr, J.P., Paerl, H.W., Bergman, B. & Carpenter, E.J. *Trichodesmium*, a  
495 globally significant marine cyanobacterium. *Science* **276**, 1221-1229 (1997).
- 496 21. Chen, Y.B., Dominic, B., Mellon, M.T. & Zehr, J.P. Circadian rhythm of nitrogenase gene  
497 expression in the diazotrophic filamentous nonheterocystous cyanobacterium  
498 *Trichodesmium* sp. strain IMS 101. *Journal of Bacteriology* **180**, 3598-3605 (1998).
- 499 22. Hong, H. *et al.* The complex effects of ocean acidification on the prominent N<sub>2</sub>-fixing  
500 cyanobacterium *Trichodesmium*. *Science* **356**, 527-531 (2017).
- 501 23. Shi, D., Shen, R., Kranz, S.A., Morel, F.M.M. & Hong, H. Response to Comment on "The  
502 complex effects of ocean acidification on the prominent N<sub>2</sub>-fixing cyanobacterium  
503 *Trichodesmium*". *Science* **357**(2017).
- 504 24. Reimers, A.M., Knoop, H., Bockmayr, A. & Steuer, R. Cellular trade-offs and optimal  
505 resource allocation during cyanobacterial diurnal growth. *Proceedings of the National*  
506 *Academy of Sciences of the United States of America* **114**, E6457-E6465 (2017).
- 507 25. Milligan, A.J., Berman-Frank, I., Gerchman, Y., Dismukes, G.C. & Falkowski, P.G. Light-  
508 dependent oxygen consumption in nitrogen-fixing cyanobacteria plays a key role in  
509 nitrogenase protection. *Journal of Phycology* **43**, 845-852 (2007).
- 510 26. Behrenfeld, M.J. & Milligan, A.J. Photophysiological expressions of iron stress in  
511 phytoplankton. *Annual Review of Marine Science* **5**, 217-246 (2013).
- 512 27. Berman-Frank, I. *et al.* Segregation of nitrogen fixation and oxygenic photosynthesis in  
513 the marine cyanobacterium *Trichodesmium*. *Science* **294**, 1534-1537 (2001).
- 514 28. Gallon, J.R. The oxygen sensitivity of nitrogenase: A problem for biochemists and micro-  
515 organisms. *Trends In Biochemical Sciences* **6**, 19-23 (1981).
- 516 29. Hutchins, D.A. *et al.* CO<sub>2</sub> control of *Trichodesmium* N<sub>2</sub> fixation, photosynthesis, growth  
517 rates, and elemental ratios: Implications for past, present, and future ocean biogeochemistry.  
518 *Limnology and Oceanography* **52**, 1293-1304 (2007).
- 519 30. Eichner, M., Kranz, S.A. & Rost, B. Combined effects of different CO<sub>2</sub> levels and N  
520 sources on the diazotrophic cyanobacterium *Trichodesmium*. *Physiologia Plantarum* **152**,  
521 316-330 (2014).
- 522 31. Levitan, O. *et al.* Elevated CO<sub>2</sub> enhances nitrogen fixation and growth in the marine  
523 cyanobacterium *Trichodesmium*. *Global Change Biology* **13**, 531-538 (2007).
- 524 32. Kranz, S.A., Sültemeyer, D., Richter, K.-U. & Rost, B. Carbon acquisition by  
525 *Trichodesmium*: The effect of pCO<sub>2</sub> and diurnal changes. *Limnology and Oceanography*  
526 **54**, 548-559 (2009).
- 527 33. Barcelos e Ramos, J., Biswas, H., Schulz, K.G., LaRoche, J. & Riebesell, U. Effect of  
528 rising atmospheric carbon dioxide on the marine nitrogen fixer *Trichodesmium*. *Global*  
529 *Biogeochemical Cycles* **21**, GB2028 (2007).
- 530 34. Inomura, K. *et al.* Quantifying oxygen management and temperature and light  
531 dependencies of nitrogen fixation by *Crocospheera watsonii*. *mSphere* **4**, e00531-19  
532 (2019).
- 533 35. Staal, M., Meysman, F.J. & Stal, L.J. Temperature excludes N<sub>2</sub>-fixing heterocystous  
534 cyanobacteria in the tropical oceans. *Nature* **425**, 504-507 (2003).
- 535 36. Kustka, A.B. *et al.* Iron requirements for dinitrogen - and ammonium - supported growth  
536 in cultures of *Trichodesmium* (IMS 101): Comparison with nitrogen fixation rates and iron:  
537 carbon ratios of field populations. *Limnology and Oceanography* **48**, 1869-1884 (2003).
- 538 37. Berman-Frank, I., Cullen, J.T., Shaked, Y., Sherrell, R.M. & Falkowski, P.G. Iron  
539 availability, cellular iron quotas, and nitrogen fixation in *Trichodesmium*. *Limnology and*

- 540 *Oceanography* **46**, 1249-1260 (2001).
- 541 38. Capone, D.G., O'Neil, J.M., Zehr, J.P. & Carpenter, E.J. Basis for diel variation in  
542 nitrogenase activity in the marine planktonic cyanobacterium *Trichodesmium thiebautii*.  
543 *Applied and Environmental Microbiology* **56**, 3532-3536 (1990).
- 544 39. Shampine, L.F. & Reichelt, M.W. The MATLAB ODE Suite. *SIAM J Sci Comput* **18**, 1-22  
545 (1997).
- 546 40. Finzi-Hart, J.A. *et al.* Fixation and fate of C and N in the cyanobacterium *Trichodesmium*  
547 using nanometer-scale secondary ion mass spectrometry. *Proceedings of the National*  
548 *Academy of Sciences of the United States of America* **106**, 6345-6350 (2009).
- 549 41. Shi, T., Sun, Y. & Falkowski, P.G. Effects of iron limitation on the expression of metabolic  
550 genes in the marine cyanobacterium *Trichodesmium erythraeum* IMS101. *Environmental*  
551 *Microbiology* **9**, 2945-56 (2007).
- 552 42. Wang, S. *et al.* Costs of Dust Collection by *Trichodesmium*: Effect on Buoyancy and Toxic  
553 Metal Release. *Journal of Geophysical Research: Biogeosciences* **129**, e2023JG007954  
554 (2024).
- 555 43. Cid, A., Herrero, C., Torres, E. & Abalde, J. Copper toxicity on the marine microalga  
556 *Phaeodactylum tricorutum*: effects on photosynthesis and related parameters. *Aquatic*  
557 *Toxicology* **31**, 165-174 (1995).
- 558
